# APPLES: Scalable Distance-based Phylogenetic Placement with or without Alignments

METIN BALABAN<sup>1</sup>, SHAHAB SARMASHGHI<sup>2</sup>, AND SIAVASH MIRARAB,<sup>2,\*</sup>

<sup>1</sup> *Bioinformatics and Systems Biology Graduate Program, UC San Diego, CA 92093, USA*

<sup>2</sup> *Department of Electrical and Computer Engineering, UC San Diego, CA 92093, USA*

*\*E-mail: smirarab@ucsd.edu.*

## ABSTRACT

1 Placing a new species on an existing phylogeny has increasing relevance to several  
2 applications. Placement can be used to update phylogenies in a scalable fashion and can  
3 help identify unknown query samples using (meta-)barcoding, skimming, or metagenomic  
4 data. Maximum likelihood (ML) methods of phylogenetic placement exist, but these  
5 methods are not scalable to reference trees with many thousands of leaves, limiting their  
6 ability to enjoy benefits of dense taxon sampling in modern reference libraries. They also  
7 rely on *assembled* sequences for the reference set and aligned sequences for the query.  
8 Thus, ML methods cannot analyze datasets where the reference consists of unassembled  
9 reads, a scenario relevant to emerging applications of genome-skimming for sample  
10 identification. We introduce APPLES, a distance-based method for phylogenetic  
11 placement. Compared to ML, APPLES is an order of magnitude faster and more memory  
12 efficient, and unlike ML, it is able to place on large backbone trees (tested for up to  
13 200,000 leaves). We show that using dense references improves accuracy substantially so  
14 that APPLES on dense trees is more accurate than ML on sparser trees, where it can run.  
15 Finally, APPLES can accurately identify samples without assembled reference or aligned  
16 queries using kmer-based distances, a scenario that ML cannot handle. APPLES is  
17 available publically at [github.com/balabanmetin/apples](https://github.com/balabanmetin/apples).

18 *Key words:* Phylogenetic placement, Distance-based methods, Genome-skimming.

19

20 Phylogenetic placement is the problem of finding the optimal position for a new  
21 *query* species on an existing *backbone* (or, reference) tree. Placement, as opposed to a  
22 *de novo* reconstruction of the full phylogeny, has two advantages. In some applications  
23 (discussed below), placement is all that is needed, and in terms of accuracy, it is as good as,  
24 and even better than (Janssen *et al.*, 2018), *de novo* reconstruction. Moreover, placement  
25 can be more scalable than *de novo* reconstruction when dealing with very large trees.

26 Earlier research on placement was motivated by scalability. For example, placement  
27 is used in greedy algorithms that start with an empty tree and add sequences sequentially  
28 (e.g., Felsenstein, 1981; Desper and Gascuel, 2002). Each placement requires polynomial  
29 (often linear) time with respect to the size of the backbone, and thus, these greedy  
30 algorithms are scalable (often requiring quadratic time). Despite computational challenges  
31 (Warnow, 2017), there has been much progress in the *de novo* reconstruction of ultra-large  
32 trees (e.g., thousands to millions of sequences) using both maximum likelihood (ML) (e.g.,  
33 Price *et al.*, 2010; Nguyen *et al.*, 2015) and the distance-based (e.g., Lefort *et al.*, 2015)  
34 approaches. However, these large-scale reconstructions require significant resources. As new  
35 sequences continually become available, placement can be used to update existing trees  
36 without repeating previous computations on full dataset.

37 More recently, placement has found a new application in sample identification:  
38 given one or more *query* sequences of unknown origins, detect the identity of the (set of)  
39 organism(s) that could have generated that sequence. These identifications can be made  
40 easily using sequence matching tools such as BLAST (Altschul *et al.*, 1990) when the  
41 query either exactly matches or is very close to a sequence in the reference library.  
42 However, when the sequence is novel (i.e., has lowered similarity to known sequences in the  
43 reference), this *closest* match approach is not sufficiently accurate (Koski and Golding,  
44 2001), leading some researchers to adopt a phylogenetic approach (Sunagawa *et al.*, 2013;

45 Nguyen *et al.*, 2014). Sample identification is essential to the study of mixed environmental  
46 samples, especially of the microbiome, both using 16S profiling (e.g., Gill *et al.*, 2006;  
47 Krause *et al.*, 2008) and metagenomics (e.g., von Mering *et al.*, 2007). It is also relevant to  
48 barcoding (Hebert *et al.*, 2003) and meta-barcoding (Clarke *et al.*, 2014; Bush *et al.*, 2017)  
49 and quantification of biodiversity (e.g., Findley *et al.*, 2013). Driven by applications to  
50 microbiome profiling, placement tools like pplacer (Matsen *et al.*, 2010) and EPA(-ng)  
51 (Berger *et al.*, 2011; Barbera *et al.*, 2019) have been developed. Researchers have also  
52 developed methods for aligning query sequence (e.g., Berger and Stamatakis, 2011;  
53 Mirarab *et al.*, 2012) and for downstream steps (e.g., Stark *et al.*, 2010; Matsen and Evans,  
54 2013). These publications have made a strong case that for sample identification,  
55 placement is sufficient (i.e., *de novo* is not needed). Moreover, some studies (e.g., Janssen  
56 *et al.*, 2018) have shown that when dealing with fragmentary reads typically found in  
57 microbiome samples, placement can be *more* accurate than *de novo* construction and can  
58 lead to improved associations of microbiome with clinical information.

59 Existing phylogenetic placement methods have focused on the ML inference of the  
60 best placement – a successful approach, which nevertheless, suffers from two shortcomings.  
61 On the one hand, ML can only be applied when the reference species are *assembled* into  
62 full-length sequences (e.g., an entire gene) and are *aligned*; however, in new applications  
63 that we will describe, assembling (and hence aligning) the reference set is not possible. On  
64 the other hand, ML, while somewhat scalable, is still computationally demanding,  
65 especially in memory usage, and cannot place on backbone trees with many thousands of  
66 leaves. As the density of reference substantially impacts the accuracy and resolution of  
67 placement, this inability to use ultra-large trees as backbone also limits accuracy. This  
68 limitation has motivated alternative methods using local sensitive hashing (Brown and  
69 Truszkowski, 2013) and divide-and-conquer (Mirarab *et al.*, 2012).

70 Assembly-free and alignment-free sample identification using genome-skimming  
71 (Dodsworth, 2015) can also benefit from phylogenetic placement. A genome-skim is a

72 shotgun sample of the genome sequenced at low coverage (e.g., 1X) – so low that  
73 assembling the nuclear genome is not possible (though, mitochondrial or plastid genomes  
74 can often be assembled). Genome-skimming promises to replace traditional marker-based  
75 barcoding of biological samples (Coissac *et al.*, 2016) but limiting analyses to organelle  
76 genome can limit resolution. Moreover, mapping reads to reference genomes is also possible  
77 only for species that have been assembled, which is a small fraction of the biodiversity on  
78 Earth. Sarmashghi *et al.* (2019) have recently shown that using shared  $k$ -mers, the  
79 distance between two unassembled genome-skims with low coverage can be accurately  
80 estimated. This approach, unlike assembling organelle genomes, uses data from the entire  
81 nuclear genome and hence promises to provide a higher resolution (e.g., at species or  
82 sub-species levels) while keeping the low sequencing cost. However, ML and other methods  
83 that require assembled sequences cannot analyze genome-skims, where both the reference  
84 and the query species are unassembled genome-wide bags of reads.

85 Distance-based approaches to phylogenetics are well-studied, but no existing tool  
86 can perform distance-based placement of a query sequence on a given backbone. The  
87 distance-based approach promises to solve both shortcomings of ML methods.  
88 Distance-based methods are computationally efficient and do not require assemblies. They  
89 only need distances (however computed). Thus, they can take as input assembly-free  
90 estimates of genomic distance estimated from low coverage genome-skims using Skmer  
91 (Sarmashghi *et al.*, 2019) or other alternatives (Haubold, 2014; Leimeister *et al.*, 2017; Yi  
92 and Jin, 2013; Benoit *et al.*, 2016; Fan *et al.*, 2015; Ondov *et al.*, 2016; Jain *et al.*, 2018).  
93 While alignment-based phylogenetics has been traditionally more accurate than  
94 alignment-free methods when both methods are possible, in these new scenarios, only  
95 alignment-free methods are applicable.

96 Here, we introduce a new method for distance-based phylogenetic placement called  
97 APPLES (Accurate Phylogenetic Placement using LEast Squares). APPLES uses dynamic  
98 programming to find the optimal distance-based placement of a sequence with running

99 time and memory usage that scale linearly with the size of the backbone tree. We test  
100 APPLES in simulations and on real data, both for alignment-free and aligned scenarios.

## 101 MATERIALS AND METHODS

### 102 *Problem Statement.*

103 *Notations.* Let an unrooted tree  $T = (V, E)$  be a weighted connected acyclic  
104 undirected graph with leaves denoted by  $\mathcal{L} = \{1 \dots n\}$ . We let  $T^*$  be the rooting of  $T$  on a  
105 leaf 1 obtained by directing all edges away from 1. For node  $u \in V$ , let  $p(u)$  denote its  
106 parent,  $c(u)$  denote its set of children,  $sib(u)$  denote its siblings, and  $g(u)$  denote the set of  
107 leaves at or below  $u$  (i.e., those that have  $u$  on their path to the root), all with respect to  
108  $T^*$ . Also let  $l(u)$  denote the length of the edge  $(p(u), u)$ .

*Distances.* The tree  $T$  defines an  $n \times n$  matrix where each entry  $d_{ij}(T)$  corresponds to the path length between leaves  $i$  and  $j$ . We further generalize this definition so that  $d_{uv}(T^*)$  indicates the length of the undirected path between any two nodes of  $T^*$  (when clear, we simply write  $d_{uv}$ ). Given some input data, we can compute a matrix of all pairwise sequence distances  $\Delta$ , where the entry  $\delta_{ij}$  indicates the dissimilarity between species  $i$  and  $j$ . When the sequence distance  $\delta_{ij}$  is computed using (the correct) phylogenetic model, it will be a noisy but statistically consistent estimate of the tree distance  $d_{ij}(T)$  (Felsenstein, 2003). Given these “phylogenetically corrected” distances (e.g.  $\frac{3}{4} \ln(1 - \frac{4}{3}h)$  is the corrected hamming distance  $h$  under the Jukes and Cantor (1969) model), we can define optimization problems to recover the tree that best fits the distances. A natural choice is minimizing the (weighted) least square difference between tree and sequence distances:

$$Q^*(T) = \sum_{i=1}^n \sum_{j=1}^n w_{ij} (\delta_{ij} - d_{ij}(T))^2. \quad (1)$$

109 Here, weights (e.g.,  $w_{ij}$ ) are used to reduce the impact of large distances (expected to have  
110 high variance). A general weighting schema can be defined as  $w_{ij} = \delta_{ij}^{-k}$  for a *constant*  
111 value  $k \in \mathbb{N}$ . Standard choices of  $k$  include  $k = 0$  for the ordinary least squares (OLS)

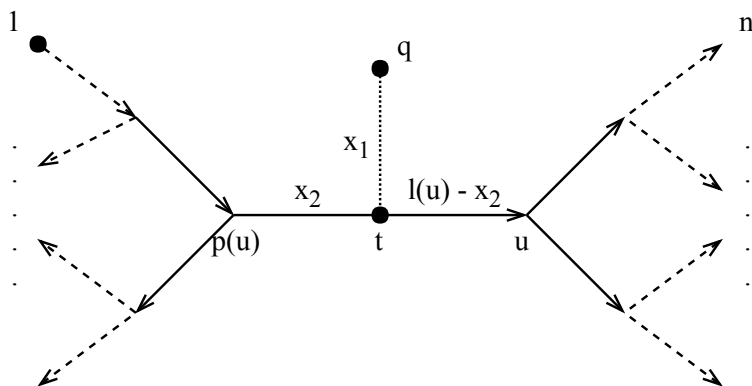

Fig. 1. Any placement of  $q$  can be characterized as a tree  $P(u, x_1, x_2)$ , shown here. The backbone tree  $T^*$  is an arborescence on leaves  $\mathcal{L} = \{1 \dots n\}$ , rooted at leaf 1. Query taxon  $q$  is added on the edge between  $u$  and  $p(u)$ , creating a node  $t$ . All placements on this edge are characterized by  $x_1$ , the length of the pendant branch, and  $x_2$ , the distance between  $t$  and  $p(u)$ .

112 method of Cavalli-Sforza and Edwards 1967,  $k = 1$  due to Beyer *et al.* 1974 (BE), and  
 113  $k = 2$  due to Fitch and Margoliash 1967 (FM).

114 Finding  $\arg \min_T Q^*(T)$  is NP-Complete (Day and Sankoff, 1987). However, decades  
 115 of research has produced heuristics like neighbor-joining (Saitou and Nei, 1987), alternative  
 116 formulations like (balanced) minimum evolution (Cavalli-Sforza and Edwards, 1967;  
 117 Desper and Gascuel, 2002), and several effective tools for solving the problem heuristically  
 118 (e.g., FastME by Lefort *et al.* 2015, DAMBE by Xia 2018, and Ninja by Wheeler 2009).

119 *Phylogenetic placement.* We let  $P(u, x_1, x_2)$  be the tree obtained by adding a  
 120 query taxon  $q$  on an edge  $(p(u), u)$ , creating three edges  $(t, q)$ ,  $(p(u), t)$ , and  $(t, u)$ , with  
 121 lengths  $x_1$ ,  $x_2$ , and  $l(u) - x_2$ , respectively (Fig. 1). When clear, we simply write  $P$  and  
 122 note that  $P$  induces  $T$  both in topology and branch length. We now define the problem.

123 *Least Squares Phylogenetic Placement (LSPP).*

124 **Input:** A backbone tree  $T$  on  $\mathcal{L}$ , a query species  $q$ , and a vector  $\Delta_{q^*}$  with elements  $\delta_{qi}$   
 125 giving sequence distances between  $q$  and every species  $i \in \mathcal{L}$ ;

**Output:** The placement tree  $P$  that adds  $q$  on  $T$  and minimizes

$$Q(P) = \sum_{i=1}^n w_{qi} (\delta_{qi} - d_{qi}(P))^2 \quad (2)$$

*Linear Time Solution for LSPP*

126

127 The number of possible placements of  $q$  is  $2n - 3$ . Therefore, LSPP can be solved by  
 128 simply iterating over all the topologies, optimizing the score for that branch, and returning  
 129 the placement with the minimum least square error. A naive algorithm can accomplish this  
 130 in  $\Theta(n^2)$  running time by optimizing Eq. 2 for each of the  $2n - 3$  branches. However, using  
 131 dynamic programming, the optimal solution can be found in linear time.

132 **THEOREM 1** The LSPP problem can be solved with  $\Theta(n)$  running time and memory.

133 The proof (given in Appendix A) follows easily from three lemmas that we next  
 134 state. The algorithm starts with precomputing a fixed-size set of values for each nodes. For  
 135 any node  $u$  and exponents  $a \in \mathbb{Z}$  and  $b \in \mathbb{N}^+$ , let  $S(a, b, u) = \sum_{i \in g(u)} \delta_{qi}^a d_{ui}^b$  and for  $b = 0$ ,  
 136 let  $S(a, 0, u) = S'(a, u) = \sum_{i \in g(u)} \delta_{qi}^a$ . Note that  $S'(0, u) = |g(u)|$ . Similarly, for  $u \in V \setminus \{1\}$ ,  
 137 let  $R(a, b, u) = \sum_{i \notin g(u)} \delta_{qi}^a d_{p(u)i}^b$  for  $b > 0$  and let  $R(a, 0, u) = R'(a, u) = \sum_{i \notin g(u)} \delta_{qi}^a$ .

138 **LEMMA 2** The set of all  $S(a, b, u)$  and  $R(a, b, u)$  values can be precomputed in  $\Theta(n)$  time  
 139 with two tree traversals using the dynamic programming given by:

$$S(a, b, u) = \begin{cases} \delta_{qu}^a & u \in \mathcal{L} \setminus \{1\} \ \& \ b = 0 \\ 0 & u \in \mathcal{L} \setminus \{1\} \ \& \ b \neq 0 \\ \sum_{j=0}^b \sum_{v \in c(u)} l(v)^j \binom{b}{j} S(a, b-j, v) & u \notin \mathcal{L} \setminus \{1\} \end{cases} \quad (3)$$

$$R(a, b, u) = \begin{cases} \delta_{q1}^a & u = 1' = c(1) \ \& \ b = 0 \\ 0 & u = 1' = c(1) \ \& \ b \neq 0 \\ \sum_{j=0}^b \left( l(p(u))^j \binom{b}{j} R(a, b-j, p(u)) + \sum_{v \in sib(u)} l(v)^j \binom{b}{j} S(a, b-j, v) \right) & u \notin \{1, 1'\} \end{cases} \quad (4)$$

140 **LEMMA 3** Equation 2 can be rearranged (see Eq. S2 in Appendix A) such that computing  
 141  $Q(P)$  for a given  $P = P(u, x_1, x_2)$  requires a constant time computation using  $S(a, b, u)$   
 142 and  $R(a, b, u)$  values for  $-k \leq a \leq 2 - k$  and  $0 \leq b \leq 2$ .

143 Thus, after a linear time precomputation, we can compute the error for any given  
 144 placement in constant time. It remains to show that for each node, the optimal placement  
 145 on the branch above it (e.g.,  $x_1$  and  $x_2$ ) can be computed in constant time.

146 LEMMA 4 For a fixed node  $u \in V \setminus \{1\}$ , if  $(\hat{x}_1, \hat{x}_2) = \arg \min_{x_1, x_2} Q(P(u, x_1, x_2))$ , then

$$\begin{bmatrix} R'(-k, u) + S'(-k, u) & R'(-k, u) - S'(-k, u) \\ R'(-k, u) - S'(-k, u) & R'(-k, u) + S'(-k, u) \end{bmatrix} \cdot \begin{bmatrix} \hat{x}_1 \\ \hat{x}_2 \end{bmatrix} = \begin{bmatrix} R'(1-k, u) + S'(1-k, u) - l(u)S'(-k, u) - R(-k, 1, u) - S(-k, 1, u) \\ R'(1-k, u) - S'(1-k, u) + l(u)S'(-k, u) - R(-k, 1, u) + S(-k, 1, u) \end{bmatrix} \quad (5)$$

147 and hence  $\hat{x}_1, \hat{x}_2$  can be computed in constant time.

148 *Non-negative branch lengths.* The solution to Equation 5 does not necessarily  
 149 conform to constraints  $0 \leq x_1$  and  $0 \leq x_2 \leq l(u)$ . However, the following lemma (proof in  
 150 Appendix A) allows us to easily impose the constraints by choosing optimal boundary  
 151 points when unrestricted solutions fall outside boundaries.

152 LEMMA 5 With respect to variables  $x_1$  and  $x_2$ ,  $Q(P(u, x_1, x_2))$  is a convex function.

153 *Minimum evolution* An alternative to directly using MLSE (Eq. 1) is the  
 154 minimum evolution (ME) principle (Cavalli-Sforza and Edwards, 1967; Rzhetsky and Nei,  
 155 1992). Our algorithm can also optimize the ME criterion: after computing  $x_1$  and  $x_2$  by  
 156 optimizing MLSE for each node  $u$ , we choose the placement with the minimum total  
 157 branch length. This is equivalent to using  $\arg \min_u x_1$ , since the value of  $x_2$  does not  
 158 contribute to total branch length. Other solutions for ME placement exist (Desper and  
 159 Gascuel, 2002), a topic we return to in the Discussion section.

160 *Hybrid.* We have observed cases where ME is correct more often than MLSE, but when it  
 161 is wrong, unlike MLSE, it has a relatively high error. This observation led us to design a  
 162 hybrid approach. After computing  $x_1$  and  $x_2$  for all branches, we first select the top  $\log_2(n)$   
 163 edges with minimum  $Q(P(u, x_1, x_2))$  values (this requires  $\Theta(n \log \log n)$  time). Among this  
 164 set of edges, we place the query on the edge satisfying the ME criteria.



165

## Datasets

166

167

168

We benchmark accuracy and scalability of APPLES in two settings: sample identification using assembly-free genome-skims on real biological data and placement using aligned sequences on simulated data.

169

### *Real genome-skim datasets for the assembly-free scenario*

170

171

172

173

174

175

176

177

*Columbicola genome-skims.* We use a set of 61 genome-skims by Boyd *et al.* (2017), including 45 known lice species (some represented multiple times) and 7 undescribed species. We generate lower coverage skims of 0.1Gb or 0.5Gb by randomly subsampling the reads from the sequence read archives (SRA) provided by the original publication (NCBI BioProject PRJNA296666). We use BBTools (Bushnell, 2014) to filter subsampled reads for adapters and contaminants and remove duplicated reads. Since this dataset is not assembled, the coverage of the genome-skims is unknown; Skmer estimates the coverage to be between 0.2X and 1X for 0.1Gb samples (and 5 times that coverage with 0.5Gb).

178

179

180

181

182

183

184

*Anopheles and Drosophila datasets.* We also use two insect datasets used by Sarmashghi *et al.* (2019): a dataset of 22 *Anopheles* and a dataset of 21 *Drosophila* genomes (Table S1), both obtained from InsectBase (Yin *et al.*, 2016). For both datasets, genome-skims with 0.1Gb and 0.5Gb sequence were generated from the assemblies using the short-read simulator tool ART, with the read length  $l = 100$  and default error profile. Since species have different genome sizes, with 0.1Gb data, our subsampled genome-skims range in coverage from 0.35X to 1X for *Anopheles* and from 0.4X to 0.8X for *Drosophila*.

185

186

187

188

189

More recently, Miller *et al.* (2018) sequenced several *Drosophila* genomes, including 12 species shared with the InsectBase dataset. Sarmashghi *et al.* (2019) subsampled the SRAs from this second project to 0.1Gb or 0.5Gb and, after filtering contaminants, obtained artificial genome-skims. We can use these genome-skims as query and the genome-skims from the InsectBase dataset as the backbone. Since the reference and query

190 come from two projects, the query genome-skim can have a non-zero distance to the same  
191 species in the reference set, providing a realistic test of sample identification applications.

192 *Simulated datasets for the aligned sequence scenario*

193 *GTR.* We use a 101-taxon dataset available from Mirarab and Warnow 2015. Sequences  
194 were simulated under the General Time Reversible (GTR) plus the  $\Gamma$  model of site rate  
195 heterogeneity using INDELible (Fletcher and Yang, 2009) on gene trees that were  
196 simulated using SimPhy (Mallo *et al.*, 2016) under the coalescent model evolving on  
197 species trees generated under the Yule model. Note that the same model is used for  
198 inference under ML placement methods (i.e., no model misspecification). We took all 20  
199 replicates of this dataset with mutation rates between  $5 \times 10^{-8}$  and  $2 \times 10^{-7}$ , and for each  
200 replicate, randomly selected five estimated gene trees among those with  $\leq 20\%$  RF distance  
201 between estimated and true gene tree. Thus, we have a total of 100 backbone trees. This  
202 dataset is the simplest test case where model violation or miss-alignment is not a concern.

203 *RNASim.* Guo *et al.* 2009 designed a complex model of RNA evolution that does not  
204 make usual i.i.d assumptions of sequence evolution. Instead, it uses models of energy of the  
205 secondary structure to simulate RNA evolution by a mutation-selection population  
206 genetics model. This model is based on an inhomogeneous stochastic process without a  
207 global substitution matrix. The model complexity of RNASim allows us to test both ML  
208 and APPLES under a substantially misspecified model. An RNASim dataset of one-million  
209 sequences (with E.coli SSU rRNA used as the root), is available from Mirarab *et al.* 2015.  
210 We created several subsets of the full RNASim dataset.

211 *i)* Heterogeneous: We first randomly subsampled the full dataset to create 10  
212 datasets of size 10,000. Then, we chose the largest clade of size at most 250 from each  
213 replicate; this gives us 10 backbone trees of mean size 249.

214 *ii)* Varied diameter: To evaluate the impact of the evolutionary diameter (i.e., the  
215 highest distance between any two leaves in the backbone), we also created datasets with

low, medium, and high diameters. We sampled the largest five clades of size at most 250 from each of the 10 replicates used for the heterogeneous dataset. Among these 50 clades, we picked the bottom, middle, and top five clades in diameter, which had diameter in  $[0.3, 0.4]$  (mean: 0.36),  $[0.5, 0.52]$  (mean: 0.51), and  $[0.65, 1.07]$  (mean: 0.82), respectively.

*iii*) Varied size (RNASim-VS): We randomly subsampled the tree of size one-million to create 5 replicates of datasets of size ( $n$ ): 500, 1000, 5000, 10000, 50000, and 100000, and 1 replicate (due to size) of size 200000. For replicates that contain at least 5000 species, we removed sites that contain gaps in 95% or more of the sequences in the alignment.

*iv*) Query scalability (RNASim-QS): We first randomly subsampled the full one-million sequence RNASim dataset to create a dataset of size 500. Then for  $k = 1$  to 49,152 queries (choosing all  $k = 3 \times 2^i, 0 \leq i \leq 14$ ) we created 5 replicates of  $k$  query sequences, again randomly subsampling from the full alignment with one-million sequences.

*v*) Alignment Error (RNASim-AE): Mirarab *et al.* (2015) used PASTA to estimate alignments on subsets of the RNASim dataset with up to 200,000 sequences. We use their reported alignment with 200,000 or 10,000 sequences (taking only replicate 1 in this case).

## Methods

*Alternative methods.* For aligned data, we compare APPLES to two ML methods: pplacer (Matsen *et al.*, 2010) and EPA-ng (Barbera *et al.*, 2019). Matsen *et al.* (2010) found pplacer to be substantially faster than EPA (Berger and Stamatakis, 2011) while their accuracy was similar. EPA-ng improves the scalability of EPA; thus, we compare to EPA-ng in analyses that concerned scalability (e.g., RNASim-VS). We run pplacer and EPA-ng in their default mode using GTR+ $\Gamma$  model and use their best hit (ML placement). We also compare with a simple method referred to as CLOSEST that places the query as the sister to the species with the minimum distance to it. CLOSEST is meant to emulate the use of BLAST (if it could be used). For the assembly-free setting, existing phylogenetic placement methods cannot be used, and we compared only against CLOSEST.

242 *APPLES Software.* We implemented APPLES using python, internally using  
243 Treeswift (Moshiri, 2018) for phylogenetic operations. APPLES computes distances  
244 internally (for certain models described below) using vectorized numpy (Oliphant, 2006)  
245 operations but can also use input distance matrices (e.g. generated using FastME). It  
246 generates the output in the standard jplace format (Matsen *et al.*, 2012).

247 *Distance calculation and models.* In computing pairwise distances, positions that  
248 have a gap in at least one of the two sequences are always ignored. In our analyses, we  
249 exclusively use models for nucleotide sequences. We compute phylogenetic distances under  
250 the parameter-free JC69 model, the six-parameter Tamura and Nei 1993 (TN93) model,  
251 and the 12-parameter general Markov model (Lockhart *et al.*, 1994). We compute distances  
252 independently for all pairs, and not simultaneously as suggested by Tamura *et al.* (2004).  
253 We also use the Gamma model of sites rate heterogeneity for JC69 and TN93 using the  
254 standard approach (Waddell and Steel, 1997). Pairing Gamma with GTR is theoretically  
255 possible in the absence of noise; however, the method can run into problems on real data  
256 (Waddell and Steel, 1997). Thus, we do not include a GTR model directly. Instead, we use  
257 the log-det approach that can handle the most general (12-parameter) Markov model  
258 (Lockhart *et al.*, 1994); however, log-det cannot account for rate across sites heterogeneity  
259 (Waddell and Steel, 1997). The  $\alpha$  parameter of the Gamma model cannot be computed  
260 from pairwise sequence comparisons (Steel, 2009); instead, we use the  $\alpha$  computed from  
261 the backbone tree. We used the  $\alpha$  parameter computed by RAxML (Stamatakis, 2014) run  
262 on the backbone alignment and given the backbone tree. For analyses with models other  
263 than JC69, we use FastME to compute distances (see Supplementary material for details)  
264 while for JC69, distances are computed by APPLES.

265 In analyses on assembly-free datasets, we first compute genomic distances using  
266 Skmer (Sarmashghi *et al.*, 2019). We then correct these distances using the JC69 model,  
267 without the Gamma model of rate variation.

268 *APPLES parameters.* We have chosen default parameter settings for APPLES and  
269 refer to this version as APPLES\*. By default, we use FM weighting, the MLSE selection  
270 criterion, enforcement of non-negative branch lengths, and JC69 distances. When not  
271 specified otherwise, these default parameters are used.

272 *Backbone alignments and trees.* For genome-skimming experiments, we estimated  
273 the backbone tree using FastME from the JC69 distance matrix computed from  
274 genome-skims using Skmer. By design, no alignments are needed.

275 For simulated datasets, we present results both based on true backbone alignments  
276 (for all datasets) and estimated alignments (for large datasets). The true alignments are  
277 known from the simulations. To test the accuracy in the presence of alignment error, we  
278 use the available PASTA backbone alignment for RNASim-AE dataset. The alignments  
279 have considerable error as measured by FastSP (Mirarab and Warnow, 2011): 11.5% and  
280 12.7% SPFN, 10.9% and 11.7% SPFP, and only 165 and 848 fully correctly aligned sites  
281 (2.2% and 6.4%), respectively for 10,000 and 200,000 sequences. As before, here, we  
282 remove sites with more than 95% gaps in the estimated alignments.

283 For true alignments, we ran RAxML (Stamatakis, 2014) using GTRGAMMA model  
284 for all datasets to compute the topology of the backbone tree except for RNASim-AE and  
285 RNASim-VS dataset, where due to the size, we used FastTree-2 (Price *et al.*, 2010). When  
286 estimated alignment is used (RNASim-AE dataset), we used the co-estimated tree output  
287 by PASTA, which is itself computed using FastTree-2. We always re-estimated branch  
288 lengths and model parameters on that fixed topology using RAxML (switching to  
289 GTRCAT for  $n \geq 10,000$ ) before running ML methods. For APPLES, we re-estimated  
290 branch lengths using FastTree-2 under the JC69 model to match the model used for  
291 estimating distances.

292 *Alignment of queries.* For analyses with true alignment as the backbone, we also  
293 use the true alignment of the queries to the backbone. In analyses with estimated

294 backbone alignments, we align the query sequences to the estimated backbone alignment  
295 using SEPP (Mirarab *et al.*, 2012), which is a divide-and-conquer method that internally  
296 uses HMMER (Eddy, 1998, 2009), with alignment subset size set to 10% of the full set  
297 (default setting). We use the resulting extended alignment, after masking unaligned sites,  
298 to run both APPLES and EPA-ng, in both cases, placing on the full backbone tree. We  
299 also report results using default SEPP (which runs pplacer internally); however, here, due  
300 to limitations of pplacer, we use the default setting of SEPP, which set the placement  
301 subset size to 10% of the full set.

### 302 *Evaluation Procedure*

303 To evaluate the accuracy, we use a leave-one-out strategy. We remove each leaf  $i$   
304 from the backbone tree  $T$  and place it back on this  $T \setminus i$  tree to obtain the placement tree  
305  $P$ . On the RNAsim-VS dataset, due to its large size, we only removed and added back 200  
306 randomly chosen leaves per replicate. On the RNAsim-AE dataset, we remove 200 queries  
307 from the backbone at the same time (leave-many-out). Finally, for RNAsim-QS, we place  $k$   
308 queries *in one run*, allowing the methods to benefit from optimizations designed for  
309 multiple queries, but note that queries are not selected from the backbone tree but are  
310 instead selected from the full dataset. In all cases, placement of queries is with respect to  
311 the backbone and not other queries.

312 *Delta error.* We measure the accuracy of a placement tree  $P$  of a single query  $q$  on  
313 a backbone tree  $T$  on leafset  $\mathcal{L}$  with respect to the true tree  $T^*$  on  $\mathcal{L} \cup \{q\}$  using delta error:

$$\Delta e(P) = |B(T^*) \setminus B(P)| - |B(T^* \upharpoonright_{\mathcal{L}}) \setminus B(T)|. \quad (6)$$

314 where  $B(\cdot)$  is the set of bipartitions of a tree and  $T^* \upharpoonright_{\mathcal{L}}$  is the true tree restricted to  $\mathcal{L}$ .  
315 Note that  $\Delta e(P) \geq 0$  because adding  $q$  cannot decrease the number of missing branches in  
316  $T$ . We report delta error averaged over all queries (denoted as  $\Delta e$ ). In leave-one-out  
317 experiments, placing  $q$  to the same location as the backbone before leaving it out can still

|                      | (a) <i>Columbicola</i> |            |           | (b) <i>Anopheles</i> |            |           | (c) <i>Drosophila</i> |            |           |
|----------------------|------------------------|------------|-----------|----------------------|------------|-----------|-----------------------|------------|-----------|
|                      | %                      | $\Delta e$ | $e_{max}$ | %                    | $\Delta e$ | $e_{max}$ | %                     | $\Delta e$ | $e_{max}$ |
| <b>APPLES*</b>       | 97                     | 0.03       | 1         | 95                   | 0.05       | 1         | 71                    | 0.29       | 1         |
| <b>APPLES-ME</b>     | 84                     | 0.28       | 5         | 95                   | 0.05       | 1         | 67                    | 0.42       | 2         |
| <b>APPLES-HYBRID</b> | 87                     | 0.16       | 2         | 95                   | 0.05       | 1         | 67                    | 0.33       | 1         |
| <b>CLOSEST</b>       | 54                     | 1.15       | 7         | 91                   | 0.09       | 1         | 57                    | 0.62       | 3         |
| <b>DE-NOVO</b>       | 98                     | 0.02       | 1         | 95                   | 0.05       | 1         | 71                    | 0.29       | 1         |

Table 1. **Assembly-free placement of genome-skims.** We show the percentage of placements into optimal position (those that do not increase  $\Delta e$ ), average delta error ( $\Delta e$ ), and maximum delta error ( $e_{max}$ ) for APPLES, assignment to the CLOSEST species, and the placement to the position in the backbone (DE-NOVO) over the 61 (a), 22 (b), and 21 (c) placements. Results are shown for genome skims with 0.1Gbp of reads. Delta error is the increase in the missing branches between the reference tree and the backbone tree after placing each query.

318 have a non-zero delta error because the backbone tree is not the true tree. We refer to the  
319 placement of a leaf into its position in the backbone tree as the *de novo* placement. In  
320 leave-many-out experiments, we measure delta error of each query separately (not the delta  
321 error of the combination of all queries). On biological data, where the true tree is unknown,  
322 we use a reference tree (Fig. S1). For *Drosophila* and *Anopheles*, we use the tree available  
323 from the Open Tree Of Life (Hinchliff *et al.*, 2015) as the reference. For *Columbicola*, we  
324 use the ML concatenation tree published by Boyd *et al.* (2017) as the reference.

## 325 RESULTS

### 326 *Assembly-free Placement of Genome-skims*

327 On our three biological genome-skim datasets, APPLES\* successfully places the  
328 queries on the optimal position in most cases (97%, 95%, and 71% for *Columbicola*,  
329 *Anopheles*, and *Drosophila*, respectively) and is never off from the optimal position by  
330 more than one branch. Other versions of APPLES are less accurate than APPLES\*; e.g.,  
331 APPLES with ME can have up to five wrong branches (Table 1). On genome-skims, where  
332 assembly and alignment are not possible, existing placement tools cannot be used, and the  
333 only alternative is the CLOSEST method (emulating BLAST if assembly was possible).  
334 CLOSEST finds the optimal placement only in 54% and 57% of times for *Columbicola* and  
335 *Drosophila*; moreover, it can be off from the best placement by up to seven branches for

336 the *Columbicola* dataset. On the *Anopheles* dataset, where the reference tree is unresolved  
337 (Fig. S1), all methods perform similarly.

338 APPLES\* is less accurate on the *Drosophila* dataset than other datasets. However,  
339 here, simply placing each query on its position in the backbone tree would lead to identical  
340 results (Table 1). Thus, placements by APPLES\* are as good as the *de novo* construction,  
341 meaning that errors of APPLES\* are entirely due to the differences between our backbone  
342 tree and the reference tree. Moreover, these errors are not due to low coverage; increasing  
343 the genome-skim size 5x (to 0.5Gb) does not decrease error (Table S4).

344 On *Drosophila* dataset, we next tested a more realistic sample identification scenario  
345 using the 12 genome-skims from the separate study (and thus, non-zero distance to the  
346 corresponding species in the backbone tree). As desired, APPLES\* places all of 12 queries  
347 from the second study as sister to the corresponding species in the reference dataset.

#### 348 *Alignment-based Placement*

349 We first compare the accuracy and scalability of APPLES\* to ML methods and  
350 then compare various settings of APPLES. For ML, we use pplacer (shown everywhere)  
351 and EPA-ng (shown only when we study scalability and work on large backbones).

#### 352 *Comparison to Maximum Likelihood (ML) without Alignment Error*

353 *GTR dataset.* On this dataset, where it faces no model misspecification, pplacer has high  
354 accuracy. It finds the best placement in 84% of cases and is off by one edge in 15%  
355 (Fig. 2a); its mean delta error ( $\Delta e$ ) is only 0.17 edges. APPLES\* is also accurate, finding  
356 the best placement in 78% of cases and resulting in the mean  $\Delta e = 0.28$  edges. Thus, even  
357 though pplacer uses ML and faces no model misspecification and APPLES\* uses distances  
358 based on a simpler model, the accuracy of the two methods is within 0.1 edges on average.  
359 In contrast, CLOSEST has poor accuracy and is correct only 50% of the times, with the  
360 mean  $\Delta e$  of 1.0 edge.



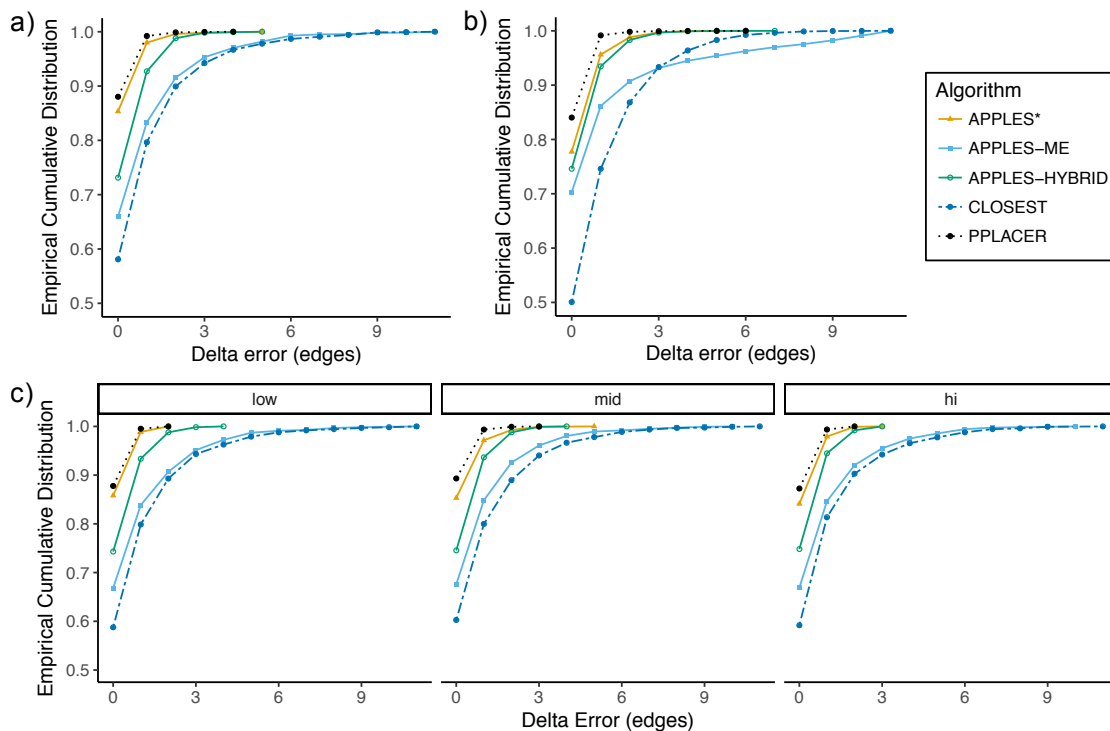

Fig. 2. **Accuracy on simulated data.** We show empirical cumulative distribution of the delta error, defined as the increase in the number of missing branches in the estimated tree compared to the true tree. We compare pplacer (dotted), CLOSEST match (dashed), and APPLES with FM weighting and JC69 distances and MLSE (APPLES\*), ME, or Hybrid optimization. (a) GTR dataset. (b) RNASim-Heterogeneous. (c) RNASim-varied diameter, shown in boxes: low, medium (mid), or high. Distributions are over 10,000 (a), 2450 (b), and 3675 (c) points.

|                | Low |            |           | Medium |            |           | High |            |           | Heterogeneous |            |           |
|----------------|-----|------------|-----------|--------|------------|-----------|------|------------|-----------|---------------|------------|-----------|
|                | %   | $\Delta e$ | $e_{max}$ | %      | $\Delta e$ | $e_{max}$ | %    | $\Delta e$ | $e_{max}$ | %             | $\Delta e$ | $e_{max}$ |
| <b>APPLES*</b> | 86  | 0.15       | 2         | 85     | 0.18       | 5         | 84   | 0.18       | 3         | 85            | 0.17       | 5         |
| <b>CLOSEST</b> | 59  | 0.88       | 13        | 60     | 0.88       | 13        | 60   | 0.85       | 14        | 60            | 0.87       | 14        |
| <b>pplacer</b> | 88  | 0.13       | 2         | 89     | 0.11       | 3         | 87   | 0.13       | 3         | 88            | 0.13       | 3         |

Table 2. The delta error for APPLES\*, CLOSEST match, and pplacer on the RNASim-varied diameter dataset (low, medium, or high) and the RNA-heterogeneous dataset. Measurements are shown over 1250 placements for each diameter size category, corresponding to 5 backbone trees and 250 placements per replicate.

361 *Model misspecification.* On the small RNASim data with subsampled clades of  $\approx 250$   
 362 species), both APPLES\* and pplacer face model misspecification. Here, the accuracy of  
 363 APPLES\* is very close to ML using pplacer. On the heterogeneous subset (Fig. 2b and  
 364 Table 2), pplacer and APPLES\* find the best placement in 88% and 85% of cases and have  
 365 a mean delta error of 0.13 and 0.17 edges, respectively. Both methods are much more  
 366 accurate than CLOSEST, which has a delta error of 0.87 edges on average.

|                | n = 500 |            | n = 1,000 |            | n = 5,000  |            | n = 10000 |            | n = 100,000 |            | n = 200,000 |            |
|----------------|---------|------------|-----------|------------|------------|------------|-----------|------------|-------------|------------|-------------|------------|
|                | %       | $\Delta e$ | %         | $\Delta e$ | %          | $\Delta e$ | %         | $\Delta e$ | %           | $\Delta e$ | %           | $\Delta e$ |
| <b>APPLES*</b> | 75      | 0.32       | 71        | 0.43       | 77         | 0.37       | 79        | 0.33       | 84          | 0.25       | 87          | 0.25       |
| <b>CLOSEST</b> | 52      | 1.16       | 53        | 1.18       | 54         | 1.15       | 59        | 0.90       | 61          | 0.69       | 63          | 0.70       |
| <b>EPA-ng</b>  | 73      | 0.33       | 73        | 0.31       | 78         | 0.24       | 79        | 0.22       | n.p         | n.p        | n.p         | n.p        |
| <b>pplacer</b> | 80      | 0.23       | 81        | 0.20       | fail (800) | n.p        | n.p       | n.p        | n.p         | n.p        | n.p         | n.p        |

Table 3. Percentage of correct placements (shown as %) and the delta error ( $\Delta e$ ) on the RNASim datasets with various backbone size ( $n$ ). % and  $\Delta e$  is over 1000 placements (except  $n = 200,000$ , which is over 200 placements). Running pplacer and EPA-ng was not possible (n.p) for trees with at least 10,000 leaves and failed in some cases (number of fails shown) for 5,000 leaves.

367 *Impact of diameter.* When we control the tree diameter, APPLES\* and pplacer remain  
 368 very close in accuracy (Fig. 2c). The changes in error are small and not monotonic as the  
 369 diameters change (Table 2). The accuracies of the two methods at low and high diameters  
 370 are similar. The two methods are most divergent in the medium diameter case, where  
 371 pplacer has its lowest error ( $\Delta e = 0.11$ ) and APPLES\* has its highest error ( $\Delta e = 0.18$ ).

372 To summarize results on small RNASim dataset with model misspecification,  
 373 although APPLES\* uses a parameter-free model, its accuracy is extremely close to ML  
 374 using pplacer with the GTR+ $\Gamma$  model.

375 *Impact of taxon sampling.* The real advantage of APPLES\* over pplacer becomes clear for  
 376 placing on larger backbone trees (Fig. 3 and Table 3). For backbone sizes of 500 and 1000,  
 377 pplacer continues to be slightly more accurate than APPLES\* (mean  $\Delta e$  of pplacer is  
 378 better than APPLES\* by 0.09 and 0.23 edges, respectively). However, with backbones of  
 379 5000 leaves, pplacer fails to run on 449/1000 cases, producing infinity likelihood (perhaps  
 380 due to numerical issues) and has 41 times higher error than APPLES\* on the rest  
 381 (Fig. S2). Since pplacer could not scale to 5,000 leaves, we also test the recent method,  
 382 EPA-ng (Barbera *et al.*, 2019). Given the 64GB of memory available on our machine,  
 383 EPA-ng is able to run on datasets with up to 10,000 leaves. EPA-ng finds the correct  
 384 placement less often than pplacer but is close to APPLES\* (Fig. 3a). However, when it has  
 385 error, it tends to have a somewhat lower distance to the correct placement, making its  
 386 mean error slightly better than APPLES\* (Fig. 3b and Table 3).

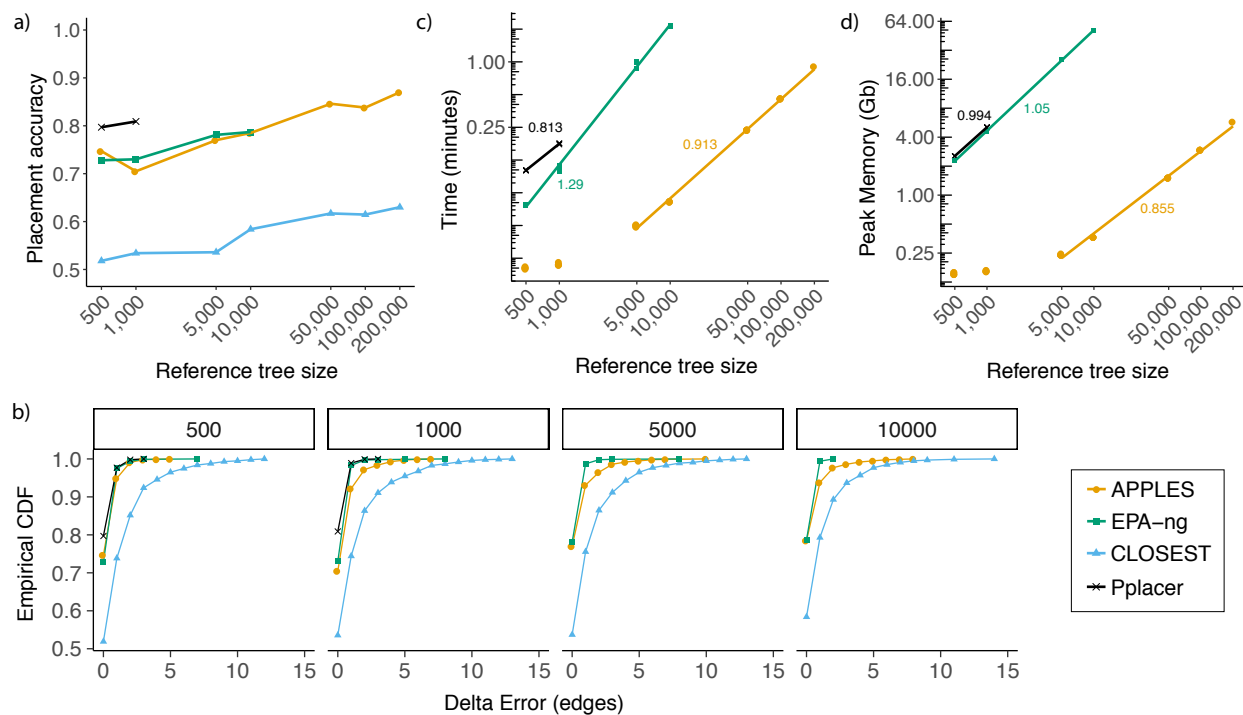

Fig. 3. **Results on RNASim-VS.** (a) Placement accuracy with taxon sampling ranging from 500 to 200,000. (b) The empirical cumulative distribution of the delta error, shown for  $500 \leq n \leq 10000$  where EPA-ng can run. (c,d) Running time and peak memory usage of placement methods for a single placement. Lines are fitted in the log-log scale and their slope (indicated on the figure) empirically estimates the polynomial degree of the asymptotic growth ( $t = n^a \Rightarrow \log t = a \log n$ ). APPLES lines are fitted to  $\geq 5,000$  points because the first two values are small and irrelevant to asymptotic behavior. All calculations are on 8-core, 2.6GHz Intel Xeon CPUs (Sandy Bridge) with 64GB of memory, with each query placed independently and given 1 CPU core and the entire memory.

387 For backbone trees with more than 10,000 leaves, pplacer and EPA-ng are not able  
 388 to run given computational resources at hand, and CLOSEST is not very accurate (finding  
 389 the best placement in only 59% of cases). However, APPLES\* continues to be accurate for  
 390 all backbone sizes. As the backbone size increases, the taxon sampling of the tree is  
 391 improving (recall that these trees are all random subsets of the same tree). With denser  
 392 backbone trees, APPLES\* has increased accuracy despite placing on larger trees (Fig. 3a,  
 393 Table 3). For example, using a backbone tree of 200,000 leaves, APPLES\* is able to find  
 394 the best placement of query sequences in 87% of cases, which is better than the accuracy  
 395 of either APPLES\* or ML tools on any backbone size. Thus, an increased taxon sampling  
 396 helps accuracy, but ML tools are limited in the size of the tree they can handle given  
 397 relatively powerful machines (e.g., 64GB of memory).

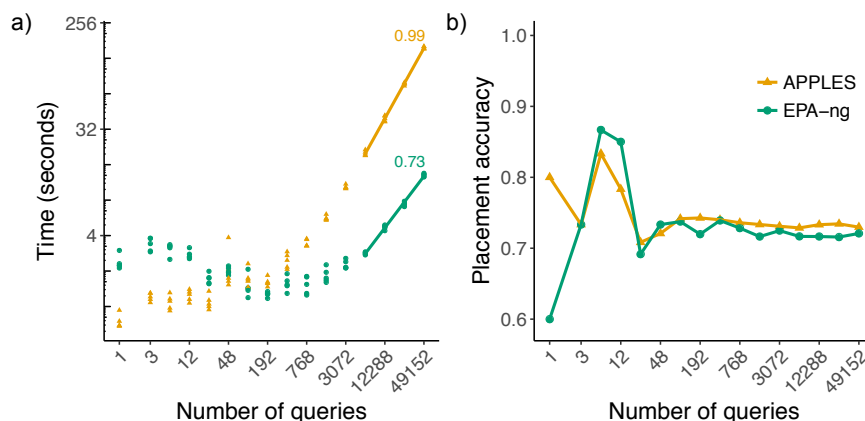

Fig. 4. **Scalability with respect to the number of queries.** We show wall-clock running time (a) and accuracy (b) with respect to increased numbers of queries ( $k$ ) in one execution given 28 CPU cores on a Intel Xeon E5 CPU with 64 GB of memory. We fit a line to running times in log-log scale only for  $k \geq 6144$  because otherwise, the preprocessing time would distort estimates (note:  $t = n^a + b \not\approx \log t = a \log n + \epsilon$  except in approximation if  $b \ll t$ ).

398 *Running time and memory.* As the backbone size increases, the running times of  
399 pplacer and APPLES grow close to linearly with the size of the backbone tree,  $n$ , whereas  
400 running time of EPA-ng seems to grow with  $n^{1.3}$  (Fig. 3c). APPLES is on average 13 times  
401 faster than pplacer and 7.5 times faster than EPA-ng on backbone trees with 1000 leaves,  
402 and is 41 times faster than EPA-ng with 10,000-taxon backbones.

403 The memory consumption of all methods increases close to linearly with the  $n$ , but  
404 APPLES requires dramatically less memory (Fig. 3d). For example, for placing on a  
405 backbone with 10,000 leaves, EPA-ng requires 51GB of memory, whereas APPLES requires  
406 only 0.4GB. APPLES easily scales to a backbone of 200,000 sequences, running in only 1  
407 minute and using 6GB of memory per query (including all precomputations in the  
408 dynamic programming). These numbers also include the time and memory needed to  
409 compute the distance between the query sequence and all the backbone sequences.

410 We next test the scalability of APPLES\* and EPA-ng with respect to the number of  
411 queries,  $k$ , in one run given 28 CPU cores on RNASim-QS dataset. Both methods spend  
412 time on preprocessing steps that will be amortized over a large number of queries. The  
413 running time of APPLES\*, as expected, increases linearly with  $k > 200$  and grow more  
414 slowly for  $k < 200$  (due to the preprocessing) (Fig. 4a). The patterns of running time of

415 EPA-ng are surprising. Increasing  $k$  from 1 to 768 *decreases* the running time instead of  
416 increasing it. While the exact reasons for the reductions are not clear to us, we note that  
417 EPA-ng developers have taken great care to implement various optimizations, especially  
418 for utilizing multiple cores. The current version of APPLES\*, in contrast, simply treats all  
419 queries as independent. Only with  $k > 768$  we start to see increasing running times for  
420 EPA-ng. With  $k > 3072$ , EPA-ng seems to grow in running with  $k^{0.73}$ ; however, we suspect  
421 further increasing  $k$  would increase the exponent (asymptotic running time cannot  
422 theoretically be less than  $O(k)$  as all queries need to be read). Aside from the fluctuation  
423 due to small sample size for small  $k$  values, the number of queries do not seem to affect the  
424 accuracy for either method (Fig. 4b).

425 *Comparing parameters of APPLES.* Comparing five models of sequence evolution  
426 available in APPLES\*, we see similar patterns of accuracy across all models despite their  
427 varying complexity, ranging from 0 to 12 parameters (Fig. S3). Since the JC69 model is  
428 parameter-free and results in similar accuracy to others, we have used it as the default.  
429 Next, we ask whether imposing the constraint to disallow negative branch lengths  
430 improves the accuracy. The answer depends on the optimization strategy. Forcing  
431 non-negative lengths marginally increases the accuracy for MLSE but dramatically reduces  
432 the accuracy for ME (Fig. S4ab). Thus, we always impose non-negative constraints on  
433 MLSE but never for ME. Likewise, our Hybrid method includes the constraint for the first  
434 MLSE step but not for the following ME step (Fig. S4c).

435 The next parameter to choose is the weighting scheme. Among the three methods  
436 available in APPLES, the best accuracy belongs to the FM scheme closely followed by the  
437 BE (Fig. S5). The OLS scheme, which does not penalize long distances, performs  
438 substantially worse than FM and BE. Thus, the most aggressive form of weighting (FM)  
439 results in the best accuracy. Fixing the weighting scheme to FM and comparing the three  
440 optimization strategies (MLSE, ME, and Hybrid), the MLSE approach has the best  
441 accuracy (Fig. 2), finding the correct placement 84% of the time (mean error: 0.18), and

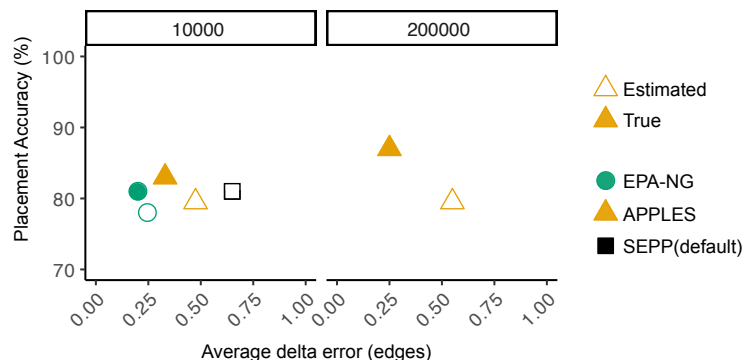

Fig. 5. **Impact of alignment error on placement accuracy.** Left and right panels show placement accuracy and mean delta error of leave-many-out experiments for backbone size of 10,000 and 200,000 (200 queries each).

442 ME has the lowest accuracy, finding the best placement in only 67% of cases (mean error:  
443 0.70). The Hybrid approach is between the two (mean error: 0.34) and fails to outperform  
444 MLSE on this dataset. However, when we restrict the RNASim backbone trees to only 20  
445 leaves, we observe that Hybrid can have the best accuracy (Fig. S6).

#### 446 *Comparison to ML with Alignment Error*

447 We next test the impact of alignment errors. On RNASim-AE dataset with  
448  $n = 200,000$  sequences, we observe 80% placement accuracy using SEPP+APPLES\*  
449 (Fig. 5), only 7% less than placing on the true backbone alignment with the true alignment  
450 of the query to the backbone. Similarly, on the  $n = 10,000$  backbone, placement accuracy  
451 drops from 83% on the true alignment to 80% using SEPP+APPLES\*, and from 81% to  
452 78% using SEPP+EPA-ng. Despite the relatively small drops on placement accuracy, the  
453 impact of alignment error on delta error can be more pronounced (Fig. 5). The mean delta  
454 error for  $n = 10,000$  and  $n = 200,000$  goes up from 0.33 and 0.25 edges, respectively, to  
455 0.48 and 0.55 edges.

456 Recall that SEPP+APPLES\* eliminates the need for decomposing the backbone  
457 tree into smaller placement subtrees, as default SEPP must do to deal with memory  
458 requirements of pplacer (which it internally uses). Comparison of default SEPP and  
459 SEPP+APPLES\* shows that incorporating APPLES\* inside SEPP reduces the mean delta

460 error from 0.65 to 0.48, while it hurts placement accuracy by 1% (81% vs 80%). To  
461 summarize, highly accurate placement is possible even with estimated alignments with  
462 backbones of size up to 200,000 using the divide-and-conquer methods PASTA and SEPP  
463 for estimating alignments of the backbone and query, respectively.

## 464 DISCUSSION

465 We introduced APPLES: a new method for adding query species onto large  
466 backbone trees using both unassembled genome-skims and aligned data. We now provide  
467 further observations on our results and on distance-based placement.

### 468 *Further observations on the results*

469 The accuracy of APPLES was very close to ML in most settings where we could  
470 run ML; the accuracy advantages of ML were particularly small for the RNASim dataset  
471 where both methods face model misspecification. As expected by the substantial evidence  
472 from the literature (Hillis *et al.*, 2003; Zwickl and Hillis, 2002), improved taxon sampling  
473 increased the accuracy of placement. Thus, overall, the best accuracy on RNASim dataset  
474 was obtained by APPLES\* run on the full reference dataset, further motivating its use  
475 when large backbones are available. Despite many strides made in terms of scalability by  
476 the new method EPA-ng, ML methods still have to restrict their backbone to at most  
477 several thousand species given reasonable amounts of memory (up to 64GB in our case).  
478 We also note that it is possible to follow the APPLES\* placement with a round of ML  
479 placement on smaller trees, but the small differences in accuracy of ML and APPLES\* on  
480 smaller trees did not give us compelling reasons to try such hybrid approaches.

481 APPLES was an order of magnitude or more faster and less memory-hungry than  
482 ML tools (pplacer and EPA-ng) for single query runs. However, for placing large numbers  
483 of queries (e.g., as found in metagenomic datasets) on a relatively small sized backbone  
484 ( $n = 500$ ), EPA-ng had an advantage thanks to heuristics it employs and carefully

485 engineered code. Advantages in memory consumption and scalability to large backbone  
486 trees remain for APPLES\* regardless of the number of queries. The python APPLES code  
487 is not optimized nearly as much as EPA-ng and can also benefit from some of the heuristic  
488 techniques used by EPA-ng. We plan for the future versions of the code to focus on  
489 improved scalability as the number of queries increases.

490 By incorporating APPLES inside SEPP, we were able to create a method that can  
491 do both alignment and placement on very large backbones with reasonable computational  
492 requirements and high accuracy. We observed relatively small reductions in accuracy as a  
493 result of alignment error, a pattern that we find remarkable given the size of the tree and  
494 the amount of error in the estimated alignment. The default SEPP method deals with  
495 large backbone trees by dividing the backbone tree into “placement” subtrees and choosing  
496 which subtree to place on using bit-scores produced by HMMs trained on subsets of  
497 sequences. The original paper had shown that the best accuracy is obtained with the  
498 largest possible backbone subtrees given computational limitations. APPLES now enables  
499 us to eliminate the need for decomposition into placement subsets, and in doing so, reduces  
500 placement error.

501 In our analyses, we observed no advantage in using models more complex than  
502 JC69+ $\Gamma$  for distance calculation inside APPLES. However, these results may be due to our  
503 pairwise estimation of model parameters (e.g., base compositions). More complex models  
504 may perform better if we instead estimate model parameters on the backbone  
505 alignment/tree and reuse the parameters for queries (or simultaneously among all queries  
506 and the reference sequences). Simultaneous estimation of distances has many advantages  
507 over using independent distances for the *de novo* case (Tamura *et al.*, 2004; Xia, 2009);  
508 these results give us hope that using simultaneous distances inside APPLES can further  
509 improve its accuracy.

510 Branch lengths of our backbone trees were computed using the same distance model  
511 as the one used for computing the distance of the query to backbone species. Using



512 consistent models for the query and for the backbone branch lengths is essential for  
513 obtaining good accuracy (see Fig. S7 for evidence). Thus, in addition to having a large  
514 backbone tree at hand, we need to ensure that branch lengths are computed using the  
515 right model. Fortunately, FastTree-2 can compute both topologies and branch lengths on  
516 large trees in a scalable fashion, without a need for quadratic time/memory computation  
517 of distance matrices (Price *et al.*, 2010).

### 518 *Observations on distance-based placement*

519 Phylogenetic insertion using the ME criterion has been previously studied for the  
520 purpose of creating an algorithm for greedy minimum evolution (GME). Desper and  
521 Gascuel 2002 have designed a method that given the tree  $T$  can update it to get a tree  
522 with  $n + 1$  leaves in  $\Theta(n)$  after precomputation of a data-structure that gives the average  
523 *sequence* distances between all adjacent clusters in  $T$ . The formulation by Desper and  
524 Gascuel 2002 has a subtle but consequential difference from our ME placement. Their  
525 algorithm does not compute branch lengths for inserted sequence (e.g.,  $x_1$  and  $x_2$ ). It is  
526 able to compute the optimal placement topology *without* knowing branch lengths of the  
527 backbone tree. Instead, it relies on pairwise distances among backbone *sequences* ( $\Delta$ ),  
528 which are precomputed and saved in the data-structure mentioned before. In the context of  
529 the greedy algorithm for tree inference, in each iteration, the data structure can be updated  
530 in  $\Theta(n)$ , which does not impact the overall running time of the algorithm. However, if we  
531 were to start with a tree of  $n$  leaves, computing this structure from scratch would still  
532 require  $\Theta(n^2)$ . Thus, computing the placement for a new query would need quadratic time,  
533 unless if the  $\Theta(n^2)$  precomputation is allowed to be amortized over  $\Omega(n)$  queries. Our  
534 formulation, in contrast, uses branch lengths of the backbone tree (which is assumed fixed)  
535 and thus never uses pairwise distances among the backbone sequences. Thus, using tree  
536 distances is what allows us to develop a linear time algorithm. Finally, we note that in our  
537 experimental analyses, we were not able to test the distance-based algorithm of Desper and

538 Gascuel (2002) because it is available only as part of a the greedy algorithm inside FastME  
539 but is not available as a stand-alone feature to place on a given tree.

540 We emphasize that our results in assembly-free tests do not advocate for the use of  
541 assembly-free methods when assemblies are available. Moreover, we have no evidence that  
542 assembly-free methods are effective in inferring deep branches of a phylogeny. Instead, our  
543 results show that assembly-free phylogenetic placement is effective in sample identification  
544 where assembly is not possible due to low coverage. In assembly-free analyses, we used  
545 Skmer to get distances because alternative alignment-free methods of estimating distance  
546 generally either require assemblies (e.g., Haubold, 2014; Leimeister and Morgenstern, 2014;  
547 Leimeister *et al.*, 2017) or higher coverage than Skmer (e.g., Benoit *et al.*, 2016; Yi and  
548 Jin, 2013; Ondov *et al.*, 2016); however, combining APPLES with other alignment-free  
549 methods can be attempted in future (finding the best way of computing distances without  
550 assemblies was not our focus). Moreover, the Skmer paper has described a trick that can  
551 be used to compute log-det distances from genome-skims. Future studies should test  
552 whether using that trick and using GTR instead of JC69 improves accuracy.

553 ACKNOWLEDGMENTS

554 This work was supported by the National Science Foundation (NSF) grant  
555 IIS-1565862 and National Institutes of Health (NIH) subaward 5P30AI027767-28 to M.B.  
556 and S.M., and NSF grant NSF-1815485 to M.B., S.S., and S.M. Computations were  
557 performed on the San Diego Supercomputer Center (SDSC) through XSEDE allocations,  
558 which is supported by the NSF grant ACI-1053575.

559 REFERENCES

560 Altschul, S. F., Gish, W., Miller, W., Myers, E. W., and Lipman, D. J. 1990. Basic local  
561 alignment search tool. *Journal of molecular biology*, 215(3): 403–10.

- 562 Barbera, P., Kozlov, A. M., Czech, L., Morel, B., Darriba, D., Flouri, T., and Stamatakis,  
563 A. 2019. EPA-ng: Massively Parallel Evolutionary Placement of Genetic Sequences.  
564 *Systematic Biology*, 68(2): 365–369.
- 565 Benoit, G., Peterlongo, P., Mariadassou, M., Drezen, E., Schbath, S., Lavenier, D., and  
566 Lemaitre, C. 2016. Multiple comparative metagenomics using multiset k-mer counting.  
567 *PeerJ Computer Science*, 2: e94.
- 568 Berger, S. A. and Stamatakis, A. 2011. Aligning short reads to reference alignments and  
569 trees. *Bioinformatics*, 27(15): 2068–2075.
- 570 Berger, S. A., Krompass, D., and Stamatakis, A. 2011. Performance, accuracy, and Web  
571 server for evolutionary placement of short sequence reads under maximum likelihood.  
572 *Systematic biology*, 60(3): 291–302.
- 573 Beyer, W. A., Stein, M. L., Smith, T. F., and Ulam, S. M. 1974. A molecular sequence  
574 metric and evolutionary trees. *Mathematical Biosciences*, 19(1-2): 9–25.
- 575 Boyd, B. M., Allen, J. M., Nguyen, N., Sweet, A. D., Warnow, T., Shapiro, M. D., Villa,  
576 S. M., Bush, S. E., Clayton, D. H., and Johnson, K. P. 2017. Phylogenomics using  
577 Target-restricted Assembly Resolves Intra-generic Relationships of Parasitic Lice  
578 (Phthiraptera: Columbicola ). *Systematic Biology*, page syx027.
- 579 Brown, D. and Truszkowski, J. 2013. LSHPlace: Fast phylogenetic placement using  
580 locality-sensitive hashing. In *Pacific Symposium On Biocomputing*, pages 310–319.
- 581 Bush, A., Sollmann, R., Wilting, A., Bohmann, K., Cole, B., Balzter, H., Martius, C.,  
582 Zlinszky, A., Calvignac-Spencer, S., Cobbold, C. A., Dawson, T. P., Emerson, B. C.,  
583 Ferrier, S., Gilbert, M. T. P., Herold, M., Jones, L., Leendertz, F. H., Matthews, L.,  
584 Millington, J. D. A., Olson, J. R., Ovaskainen, O., Raffaelli, D., Reeve, R., Rödel, M.-O.,  
585 Rodgers, T. W., Snape, S., Visseren-Hamakers, I., Vogler, A. P., White, P. C. L.,

- 586 Wooster, M. J., and Yu, D. W. 2017. Connecting Earth observation to high-throughput  
587 biodiversity data. *Nature Ecology & Evolution*, 1(7): 0176.
- 588 Bushnell, B. 2014. Bbtools software package. URL <http://sourceforge.net/projects/bbmap>.
- 589 Cavalli-Sforza, L. L. and Edwards, A. W. 1967. Phylogenetic analysis. Models and  
590 estimation procedures. *American journal of human genetics*, 19(3 Pt 1): 233–57.
- 591 Clarke, L. J., Soubrier, J., Weyrich, L. S., and Cooper, A. 2014. Environmental  
592 metabarcodes for insects: In silico PCR reveals potential for taxonomic bias. *Molecular*  
593 *Ecology Resources*, 14(6): 1160–1170.
- 594 Coissac, E., Hollingsworth, P. M., Lavergne, S., and Taberlet, P. 2016. From barcodes to  
595 genomes: extending the concept of DNA barcoding. *Molecular Ecology*, 25(7):  
596 1423–1428.
- 597 Day, W. H. E. and Sankoff, D. 1987. Computational complexity of inferring phylogenies  
598 from chromosome inversion data. *Journal of Theoretical Biology*, 124(2): 213–218.
- 599 Desper, R. and Gascuel, O. 2002. Fast and accurate phylogeny reconstruction algorithms  
600 based on the minimum-evolution principle. *Journal of computational biology : a journal*  
601 *of computational molecular cell biology*, 9(5): 687–705.
- 602 Dodsworth, S. 2015. Genome skimming for next-generation biodiversity analysis. *Trends*  
603 *in Plant Science*, 20(9): 525–527.
- 604 Eddy, S. R. 1998. Profile hidden Markov models. *Bioinformatics*, pages 755–763.
- 605 Eddy, S. R. 2009. A new generation of homology search tools based on probabilistic  
606 inference. *International Conference on Genome Informatics*, 23(1): 205–11.
- 607 Fan, H., Ives, A. R., Surget-Groba, Y., and Cannon, C. H. 2015. An assembly and  
608 alignment-free method of phylogeny reconstruction from next-generation sequencing  
609 data. *BMC Genomics*, 16(1): 522.

- 610 Felsenstein, J. 1981. Evolutionary trees from DNA sequences: A maximum likelihood  
611 approach. *Journal of Molecular Evolution*, 17(6): 368–376.
- 612 Felsenstein, J. 2003. *Inferring phylogenies*.
- 613 Findley, K., Oh, J., Yang, J., Conlan, S., Deming, C., Meyer, J. A., Schoenfeld, D.,  
614 Nomicos, E., Park, M., Kong, H. H., and Segre, J. A. 2013. Topographic diversity of  
615 fungal and bacterial communities in human skin. *Nature*, 498(7454): 367–370.
- 616 Fitch, W. M. and Margoliash, E. 1967. Construction of Phylogenetic Trees. *Science*,  
617 155(3760): 279–284.
- 618 Fletcher, W. and Yang, Z. 2009. INDELible: A flexible simulator of biological sequence  
619 evolution. *Molecular Biology and Evolution*, 26(8): 1879–1888.
- 620 Gill, S. R., Pop, M., Deboy, R. T., Eckburg, P. B., Turnbaugh, P. J., Samuel, B. S.,  
621 Gordon, J. I., Relman, D. A., Fraser-Liggett, C. M., and Nelson, K. E. 2006.  
622 Metagenomic analysis of the human distal gut microbiome. *Science (New York, N.Y.)*,  
623 312(5778): 1355–9.
- 624 Guo, S., Wang, L.-S., and Kim, J. 2009. Large-scale simulation of RNA macroevolution by  
625 an energy-dependent fitness model. *arXiv*, 0912.2326.
- 626 Haubold, B. 2014. Alignment-free phylogenetics and population genetics. *Briefings in*  
627 *Bioinformatics*, 15(3): 407–418.
- 628 Hebert, P. D. N., Cywinska, A., Ball, S. L., and deWaard, J. R. 2003. Biological  
629 identifications through DNA barcodes. *Proceedings of the Royal Society B: Biological*  
630 *Sciences*, 270(1512): 313–321.
- 631 Hillis, D. M., Pollock, D. D., McGuire, J. A., and Zwickl, D. J. 2003. Is sparse taxon  
632 sampling a problem for phylogenetic inference? *Systematic biology*, 52(1): 124–126.

- 633 Hinchliff, C. E., Smith, S. a., Allman, J. F., Burleigh, J. G., Chaudhary, R., Coghill, L. M.,  
634 Crandall, K. A., Deng, J., Drew, B. T., Gazis, R., Gude, K., Hibbett, D. S., Katz, L. a.,  
635 Laughinghouse, H. D., McTavish, E. J., Midford, P. E., Owen, C. L., Ree, R. H., Rees,  
636 J. a., Soltis, D. E., Williams, T. L., and Cranston, K. a. 2015. Synthesis of phylogeny  
637 and taxonomy into a comprehensive tree of life. *Proceedings of the National Academy of*  
638 *Sciences*, 112(41): 12764–12769.
- 639 Jain, C., Rodriguez-R, L. M., Phillippy, A. M., Konstantinidis, K. T., and Aluru, S. 2018.  
640 High throughput ANI analysis of 90K prokaryotic genomes reveals clear species  
641 boundaries. *Nature Communications*, 9(1): 5114.
- 642 Janssen, S., McDonald, D., Gonzalez, A., Navas-Molina, J. A., Jiang, L., Xu, Z. Z.,  
643 Winker, K., Kado, D. M., Orwoll, E., Manary, M., Mirarab, S., and Knight, R. 2018.  
644 Phylogenetic Placement of Exact Amplicon Sequences Improves Associations with  
645 Clinical Information. *mSystems*, 3(3): 00021–18.
- 646 Jukes, T. H. and Cantor, C. R. 1969. Evolution of protein molecules. In *Mammalian*  
647 *protein metabolism, Vol. III (1969), pp. 21-132*, volume III, pages 21–132.
- 648 Koski, L. B. and Golding, G. B. 2001. The closest BLAST hit is often not the nearest  
649 neighbor. *Journal of molecular evolution*, 52(6): 540–2.
- 650 Krause, L., Diaz, N. N., Goesmann, A., Kelley, S., Nattkemper, T. W., Rohwer, F.,  
651 Edwards, R. A., and Stoye, J. 2008. Phylogenetic classification of short environmental  
652 DNA fragments. *Nucleic acids research*, 36(7): 2230–9.
- 653 Lefort, V., Desper, R., and Gascuel, O. 2015. FastME 2.0: A comprehensive, accurate, and  
654 fast distance-based phylogeny inference program. *Molecular Biology and Evolution*,  
655 32(10): 2798–2800.
- 656 Leimeister, C.-A. and Morgenstern, B. 2014. kmacs: the k -mismatch average common

- 657 substring approach to alignment-free sequence comparison. *Bioinformatics*, 30(14):  
658 2000–2008.
- 659 Leimeister, C.-A., Sohrabi-Jahromi, S., and Morgenstern, B. 2017. Fast and accurate  
660 phylogeny reconstruction using filtered spaced-word matches. *Bioinformatics*, 33(7):  
661 971–979.
- 662 Lockhart, P. J., Steel, M. A., Hendy, M. D., and Penny, D. 1994. Recovering evolutionary  
663 trees under a more realistic model of sequence evolution. *Molecular Biology and*  
664 *Evolution*, 11(4): 605–612.
- 665 Mallo, D., De Oliveira Martins, L., and Posada, D. 2016. SimPhy: Phylogenomic  
666 Simulation of Gene, Locus, and Species Trees. *Systematic biology*, 65(2): 334–44.
- 667 Matsen, F. A. and Evans, S. N. 2013. Edge Principal Components and Squash Clustering:  
668 Using the Special Structure of Phylogenetic Placement Data for Sample Comparison.  
669 *PLoS ONE*, 8(3).
- 670 Matsen, F. A., Kodner, R. B., and Armbrust, E. V. 2010. pplacer: linear time  
671 maximum-likelihood and Bayesian phylogenetic placement of sequences onto a fixed  
672 reference tree. *BMC bioinformatics*, 11(1): 538.
- 673 Matsen, F. A., Hoffman, N. G., Gallagher, A., and Stamatakis, A. 2012. A Format for  
674 Phylogenetic Placements. *PLoS ONE*, 7(2): e31009.
- 675 Miller, D. E., Staber, C., Zeitlinger, J., and Hawley, R. S. 2018. Highly Contiguous  
676 Genome Assemblies of 15 Drosophila Species Generated Using Nanopore Sequencing.  
677 *G3: Genes, Genomes, Genetics*, 8(10): 3131–3141.
- 678 Mirarab, S. and Warnow, T. 2011. FastSP: linear time calculation of alignment accuracy.  
679 *Bioinformatics*, 27(23): 3250–8.
- 680 Mirarab, S. and Warnow, T. 2015. ASTRAL-II: Coalescent-based species tree estimation  
681 with many hundreds of taxa and thousands of genes. *Bioinformatics*, 31(12): i44–i52.

- 682 Mirarab, S., Nguyen, N., and Warnow, T. 2012. SEPP: SATé-Enabled Phylogenetic  
683 Placement. *Pacific Symposium On Biocomputing*, pages 247–58.
- 684 Mirarab, S., Nguyen, N., Guo, S., Wang, L.-S., Kim, J., and Warnow, T. 2015. PASTA:  
685 Ultra-Large Multiple Sequence Alignment for Nucleotide and Amino-Acid Sequences.  
686 *Journal of computational biology : a journal of computational molecular cell biology*,  
687 22(5): 377–86.
- 688 Moshiri, N. 2018. TreeSwift: a massively scalable Python tree package. *bioRxiv*.
- 689 Nguyen, L. T., Schmidt, H. A., Von Haeseler, A., and Minh, B. Q. 2015. IQ-TREE: A fast  
690 and effective stochastic algorithm for estimating maximum-likelihood phylogenies.  
691 *Molecular Biology and Evolution*, 32(1).
- 692 Nguyen, N.-p., Mirarab, S., Liu, B., Pop, M., and Warnow, T. 2014. TIPP: taxonomic  
693 identification and phylogenetic profiling. *Bioinformatics*, 30(24): 3548–3555.
- 694 Oliphant, T. E. 2006. *A guide to NumPy*, volume 1. Trelgol Publishing USA.
- 695 Ondov, B. D., Treangen, T. J., Melsted, P., Mallonee, A. B., Bergman, N. H., Koren, S.,  
696 and Phillippy, A. M. 2016. Mash: fast genome and metagenome distance estimation  
697 using MinHash. *Genome Biology*, 17(1): 132.
- 698 Price, M. N., Dehal, P. S., and Arkin, A. P. 2010. FastTree-2 Approximately  
699 Maximum-Likelihood Trees for Large Alignments. *PLoS ONE*, 5(3): e9490.
- 700 Rzhetsky, A. and Nei, M. 1992. A Simple Method for Estimating and Testing  
701 Minimum-Evolution Trees. *Molecular Biology and Evolution*, 9(5): 945–945.
- 702 Saitou, N. and Nei, M. 1987. The neighbour-joining method: a new method for  
703 reconstructing phylogenetic trees. *Molecular biology and evolution*, 4(4): 406–425.
- 704 Sarmashghi, S., Bohmann, K., P. Gilbert, M. T., Bafna, V., and Mirarab, S. 2019. Skmer:  
705 assembly-free and alignment-free sample identification using genome skims. *Genome*  
706 *Biology*, 20(1): 34.



- 707 Stamatakis, A. 2014. RAxML version 8: A tool for phylogenetic analysis and post-analysis  
708 of large phylogenies. *Bioinformatics*, 30(9): 1312–1313.
- 709 Stark, M., Berger, S. A., Stamatakis, A., and von Mering, C. 2010. MLTreeMap—accurate  
710 Maximum Likelihood placement of environmental DNA sequences into taxonomic and  
711 functional reference phylogenies. *BMC genomics*, 11(1): 461.
- 712 Steel, M. 2009. A basic limitation on inferring phylogenies by pairwise sequence  
713 comparisons. *Journal of Theoretical Biology*, 256(3): 467–472.
- 714 Sunagawa, S., Mende, D. R., Zeller, G., Izquierdo-Carrasco, F., Berger, S. a., Kultima,  
715 J. R., Coelho, L. P., Arumugam, M., Tap, J., Nielsen, H. B., Rasmussen, S., Brunak, S.,  
716 Pedersen, O., Guarner, F., de Vos, W. M., Wang, J., Li, J., Dore, J., Ehrlich, S. D.,  
717 Stamatakis, a., and Bork, P. 2013. Metagenomic species profiling using universal  
718 phylogenetic marker genes. *Nature methods*, 10(12): 1196–1199.
- 719 Tamura, K. and Nei, M. 1993. Estimation of the Number of Nucleotide Substitutions in  
720 the Control Region of Mitochondrial-DNA in Humans and Chimpanzees. *Molecular  
721 biology and evolution*, 10(3): 512–526.
- 722 Tamura, K., Nei, M., and Kumar, S. 2004. Prospects for inferring very large phylogenies  
723 by using the neighbor-joining method. *Proceedings of the National Academy of Sciences*,  
724 101(30): 11030–11035.
- 725 von Mering, C., Hugenholtz, P., Raes, J., Tringe, S. G., Doerks, T., Jensen, L. J., Ward,  
726 N., and Bork, P. 2007. Quantitative Phylogenetic Assessment of Microbial Communities  
727 in Diverse Environments. *Science*, 315(5815): 1126–1130.
- 728 Waddell, P. J. and Steel, M. A. 1997. General time-reversible distances with unequal rates  
729 across sites: mixing gamma and inverse Gaussian distributions with invariant sites.  
730 *Molecular phylogenetics and evolution*, 8(3): 398–414.

- 731 Warnow, T. 2017. *Computational phylogenetics: An introduction to designing methods for*  
732 *phylogeny estimation*. Cambridge University Press.
- 733 Wheeler, T. J. 2009. Large-scale neighbor-joining with NINJA. In *Algorithms in*  
734 *Bioinformatics*, pages 375–389. Springer.
- 735 Xia, X. 2009. Information-theoretic indices and an approximate significance test for testing  
736 the molecular clock hypothesis with genetic distances. *Molecular Phylogenetics and*  
737 *Evolution*, 52(3): 665–676.
- 738 Xia, X. 2018. DAMBE7: New and Improved Tools for Data Analysis in Molecular Biology  
739 and Evolution. *Molecular Biology and Evolution*, 35(6): 1550–1552.
- 740 Yi, H. and Jin, L. 2013. Co-phylog: an assembly-free phylogenomic approach for closely  
741 related organisms. *Nucleic acids research*, 41(7): e75.
- 742 Yin, C., Shen, G., Guo, D., Wang, S., Ma, X., Xiao, H., Liu, J., Zhang, Z., Liu, Y., Zhang,  
743 Y., Yu, K., Huang, S., and Li, F. 2016. InsectBase: a resource for insect genomes and  
744 transcriptomes. *Nucleic Acids Research*, 44(D1): D801–D807.
- 745 Zwickl, D. J. and Hillis, D. M. 2002. Increased taxon sampling greatly reduces  
746 phylogenetic error. *Systematic biology*, 51(4): 588–98.

## REFERENCES

35

747

## APPENDIX

APPENDIX A. PROOFS AND DERIVATIONS

Recall the following notations.

- For any node  $u$  and exponents  $a \in \mathbb{Z}$  and  $b \in \mathbb{N}^+$ , let

$$S(a, b, u) = \sum_{i \in g(u)} \delta_{qi}^a d_{ui}^b$$

$$R(a, b, u) = \sum_{i \notin g(u)} \delta_{qi}^a d_{p(u)i}^b \text{ defined for } u \in V \setminus \{1\}$$

- For  $b = 0$ , let  $S(a, 0, u) = \sum_{i \in g(u)} \delta_{qi}^a$  and let  $S'(a, u)$  be a shorthand for  $S(a, 0, u)$ .

$$\text{Similarly, let } R(a, 0, u) = R'(a, u) = \sum_{i \notin g(u)} \delta_{qi}^a.$$

*Proof of Lemma 2*

*Proof.* Recall the dynamic programming recursions of Equations 3 and 4:

$$S(a, b, u) = \sum_{j=0}^b \sum_{v \in c(u)} l(v)^j \binom{b}{j} S(a, b-j, v), \quad \text{for } u \notin \mathcal{L} \setminus \{1\}$$

$$R(a, b, u) = \sum_{j=0}^b \left( l(p(u))^j \binom{b}{j} R(a, b-j, p(u)) + \sum_{v \in sib(u)} l(v)^j \binom{b}{j} S(a, b-j, v) \right) \text{ for } u \notin \{1, 1'\}$$

Since  $u$  is not a leaf, for each leaf  $i \in g(u)$ , there exists a  $v \in c(u)$  such that the directed path from  $u$  to  $i$  passes through  $v$ . Therefore every leaf  $i$  can be grouped under its corresponding  $v$ .

$$\begin{aligned} S(a, b, u) &= \sum_{i \in g(u)} \delta_{qi}^a d_{ui}^b = \sum_{v \in c(u)} \sum_{i \in g(v)} \delta_{qi}^a (l(v) + d_{vi})^b = \sum_{j=0}^b \sum_{v \in c(u)} \sum_{i \in g(v)} \delta_{qi}^a d_{vi}^{b-j} l(v)^j \binom{b}{j} \\ &= \sum_{j=0}^b \sum_{v \in c(u)} l(v)^j \binom{b}{j} S(a, b-j, v) \end{aligned}$$

Similarly, given the condition  $u \neq 1$ , for each leaf  $i \notin g(u)$ , either (1) there exists  $v \in sib(u)$  such that the directed path from  $p(u)$  to  $i$  passes through  $v$ , or (2) undirected path between  $i$  and  $p(u)$  passes through  $p(p(u))$ .

$$\begin{aligned}
 R(a, b, u) &= \sum_{i \notin g(u)} \delta_{qi}^a d_{p(u)i}^b = \sum_{v \in sib(u)} \sum_{i \in g(v)} \delta_{qi}^a (l(v) + d_{vi})^b + \sum_{i \notin g(p(u))} \delta_{qi}^a (l(p(u)) + d_{p(u)i})^b \\
 &= \sum_{j=0}^b \sum_{v \in sib(u)} \sum_{i \in g(v)} \delta_{qi}^a d_{vi}^{b-j} l(v)^j \binom{b}{j} + \sum_{j=0}^b \sum_{i \notin g(p(u))} \delta_{qi}^a d_{p(u)i}^{b-j} l(p(u))^j \binom{b}{j} \\
 &= \sum_{j=0}^b \sum_{v \in sib(u)} l(v)^j \binom{b}{j} S(a, b-j, v) + \sum_{j=0}^b l(p(u))^j \binom{b}{j} R(a, b-j, p(u))
 \end{aligned}$$

759 Boundary conditions follow from definitions. For  $u \notin \mathcal{L} \setminus \{1\}$ , since  $d_{ii} = 0$ , we have  
 760  $S(a, b, u) = 0$  and it's trivial to see  $S'(a, u) = \delta_{qu}^a$ . For  $R(, , )$  recursions, the boundary case  
 761 happens at the unique child of the root, which we denote as  $1'$ . Based on the definition,  
 762 since the only  $i \notin g(1')$  is 1, and  $d_{p(1')1}^b = 0$ , we trivially have  $R(a, b, 1') = 0$ . For  $b = 0$ ,  
 763  $R'(a, 1') = \delta_{q1}^a$ .

764 A post-order traversal on  $T^*$  can compute  $S(a, b, u)$ , and a subsequent pre-order  
 765 traversal can compute  $R(a, b, u)$ , both in constant time and using constant memory per  
 766 node. Recall that  $a$  and  $b$  are both no more than  $k$ , which is a constant. Thus, time and  
 767 memory complexity of this dynamic programming is  $\Theta(bn)$ , which translates to  $\Theta(n)$  in  
 768 least squares setting, where  $b \leq 2$ . □

769 *Proof of Lemma 3.*

Recall  $w_{qi} = \delta_{qi}^{-k}$  and that Equation 2:

$$Q(P) = \sum_{i=1}^n w_{qi} (\delta_{qi} - d_{qi}(P))^2 = \sum_{i=1}^n \delta_{qi}^{-k} (\delta_{qi} - d_{qi}(P))^2$$

770 *Proof.* Equation 2 can be re-written as:

$$Q(P) = \sum_{i \in g(u)} \delta_{qi}^{-k} (\delta_{qi} - d_{ui}(P) - x_1 + x_2 - l(u))^2 + \sum_{i \notin g(u)} \delta_{qi}^{-k} (\delta_{qi} - d_{p(u)i}(P) - x_1 - x_2)^2 \tag{S1}$$

771 By simple rearrangement of the terms, we can rewrite Equation S1 as follows.

$$\begin{aligned}
 Q(P(u, x_1, x_2)) &= R'(2 - k, u) + S'(2 - k, u) + R(-k, 2, u) + S(-k, 2, u) \\
 &\quad + 2(x_1 + x_2)(R(-k, 1, u) - R'(1 - k, u)) \\
 &\quad + 2(x_1 + l(u) - x_2)(S(-k, 1, u) - S'(1 - k, u)) \tag{S2} \\
 &\quad + (x_1 + x_2)^2 R(-k, 1, u) + (x_1 + l(u) - x_2)^2 S(-k, 1, u) \\
 &\quad - 2R(1 - k, 1, u) - 2S(1 - k, 1, u)
 \end{aligned}$$

772 Note that computing  $Q(P(u, x_1, x_2))$  requires only  $S(, u)$  and  $R(, u)$  values and  $l(u)$ .

773 Thus, computing  $Q(P)$  requires only computing  $S(a, b, u)$  and  $R(a, b, u)$  values for

774  $-k \leq a \leq 2 - k$  and  $0 \leq b \leq 2$ .

775

□

776

*Proof of Lemma 4.*

Recall definitions

$$\begin{aligned}
 S(a, b, u) &= \sum_{i \in g(u)} \delta_{qi}^a d_{ui}^b \quad (\text{for } b > 0) \quad \text{and} \quad S'(a, u) = S(a, 0, u) = \sum_{i \in g(u)} \delta_{qi}^a \\
 R(a, b, u) &= \sum_{i \notin g(u)} \delta_{qi}^a d_{p(u)i}^b \quad (\text{for } b > 0) \quad \text{and} \quad R'(a, u) = R(a, 0, u) = \sum_{i \notin g(u)} \delta_{qi}^a
 \end{aligned}$$

and recall Eq. S1:

$$Q(P) = \sum_{i \in g(u)} \delta_{qi}^{-k} (\delta_{qi} - d_{ui}(P) - x_1 + x_2 - l(u))^2 + \sum_{i \notin g(u)} \delta_{qi}^{-k} (\delta_{qi} - d_{p(u)i}(P) - x_1 - x_2)^2 .$$

777 *Proof.* We take the derivative of Eq. S1 with respect to  $x_1$  and set it equal to zero:

$$\begin{aligned}
 \frac{\partial Q(P)}{\partial x_1} &= -2 \sum_{i \in g(u)} \delta_{qi}^{-k} (\delta_{qi} - d_{ui}(P) - x_1 + x_2 - l(u)) - 2 \sum_{i \notin g(u)} \delta_{qi}^{-k} (\delta_{qi} - d_{p(u)i}(P) - x_1 - x_2) = 0 \\
 &\implies \left( \sum_{i \in g(u)} \delta_{qi}^{-k} + \sum_{i \notin g(u)} \delta_{qi}^{-k} \right) x_1 + \left( - \sum_{i \in g(u)} \delta_{qi}^{-k} + \sum_{i \notin g(u)} \delta_{qi}^{-k} \right) x_2 \\
 &\quad - \sum_{i \in g(u)} \delta_{qi}^{1-k} - \sum_{i \notin g(u)} \delta_{qi}^{1-k} + \sum_{i \in g(u)} \delta_{qi}^{-k} d_{ui}(P) + \sum_{i \notin g(u)} \delta_{qi}^{-k} d_{p(u)i}(P) + l(u) \sum_{i \in g(u)} \delta_{qi}^{-k} = 0 \\
 &\implies (S'(-k, u) + R'(-k, u)) x_1 + (-S'(-k, u) + R'(-k, u)) x_2 = \\
 &\quad S'(1-k, u) + R'(1-k, u) - S(-k, 1, u) - R(-k, 1, u) - l(u) S'(-k, u)
 \end{aligned}$$

Similarly,

$$\begin{aligned}
 \frac{\partial Q(P)}{\partial x_2} &= 2 \sum_{i \in g(u)} \delta_{qi}^{-k} (\delta_{qi} - d_{ui}(P) - x_1 + x_2 - l(u)) - 2 \sum_{i \notin g(u)} \delta_{qi}^{-k} (\delta_{qi} - d_{p(u)i}(P) - x_1 - x_2) = 0 \\
 &\implies \left( - \sum_{i \in g(u)} \delta_{qi}^{-k} + \sum_{i \notin g(u)} \delta_{qi}^{-k} \right) x_1 + \left( \sum_{i \in g(u)} \delta_{qi}^{-k} + \sum_{i \notin g(u)} \delta_{qi}^{-k} \right) x_2 \\
 &\quad + \sum_{i \in g(u)} \delta_{qi}^{1-k} - \sum_{i \notin g(u)} \delta_{qi}^{1-k} - \sum_{i \in g(u)} \delta_{qi}^{-k} d_{ui}(P) + \sum_{i \notin g(u)} \delta_{qi}^{-k} d_{p(u)i}(P) - l(u) \sum_{i \in g(u)} \delta_{qi}^{-k} = 0 \\
 &\implies (-S'(-k, u) + R'(-k, u)) x_1 + (+S'(-k, u) + R'(-k, u)) x_2 = \\
 &\quad -S'(1-k, u) + R'(1-k, u) + S(-k, 1, u) - R(-k, 1, u) + l(u) S'(-k, u)
 \end{aligned}$$

778 These two linear equations have a unique solution for the pair  $x_1, x_2$  if and only if the  
 779 following matrix has the full rank:

$$H = \begin{bmatrix} R'(-k, u) + S'(-k, u) & R'(-k, u) - S'(-k, u) \\ R'(-k, u) - S'(-k, u) & R'(-k, u) + S'(-k, u) \end{bmatrix}.$$

780 Determinant of  $H$  is  $\det(H) = 4R'(-k, u)S'(-k, u)$ . Assuming that  $\delta_{qi} > 0$  for all  
 781  $i \in \mathcal{L}$ , both  $R'(-k, u) > 0$  and  $S'(-k, u) > 0$  hold. Therefore,  $H$  has the full rank.  
 782 However,  $\delta_{qi} = 0$  for  $q \neq i$  can be encountered on real data, especially for low divergence  
 783 times, low evolutionary rates, or short sequences. In this case, APPLES is designed to  
 784 place  $q$  on the pendant edge of  $i$  with  $x_1 = 0$  and  $x_2 = l(i)$ . In case there are multiple  
 785 leaves  $i$  that satisfy  $\delta_{qi} = 0$  for  $q \neq i$ , we pick one of them arbitrarily.  $\square$

*Proof of Theorem 1*

786

787 *Proof.* First, using two traversals of the tree, we compute all the  $S(a, b, u)$  and  $R(a, b, u)$   
788 values by Lemma 2. To find the optimal placement edge, we first optimize  $Q(P(u, x_1, x_2))$   
789 for all  $u \in V \setminus \{1\}$ . By Lemma 4, this task requires only constant time after the  
790 precomputations. Then, for each node, we compute  $Q(P(u, x_1, x_2))$  in constant time for the  
791 optimal  $u, x_1, x_2$  by Lemma 3. Thus, each node is processed in linear time and the whole  
792 optimization requires linear time. Note that the system of equations (shown in Lemma 4)  
793 will not have a solution iff  $\delta_{qi} \leq 0$  for some  $i$ ; if there is  $\delta_{qi} = 0$ , we make  $q$  sister to  $i$ ,  
794 breaking ties arbitrarily. □

*Proof of Lemma 5*

795

796 *Proof.* Eigenvalues of the Hessian matrix of  $Q(P(u, x_1, x_2))$  are  $2R'(-k, u)$  and  $2S'(-k, u)$ ,  
797 which are both non-negative since  $\delta_{qi} \geq 0$  for  $i \in \mathcal{L}$ . Thus, the Hessian matrix is positive  
798 semidefinite and therefore  $P(u, x_1, x_2)$  is a convex function of  $x_1$  and  $x_2$ . □



APPENDIX B. SUPPLEMENTARY FIGURES

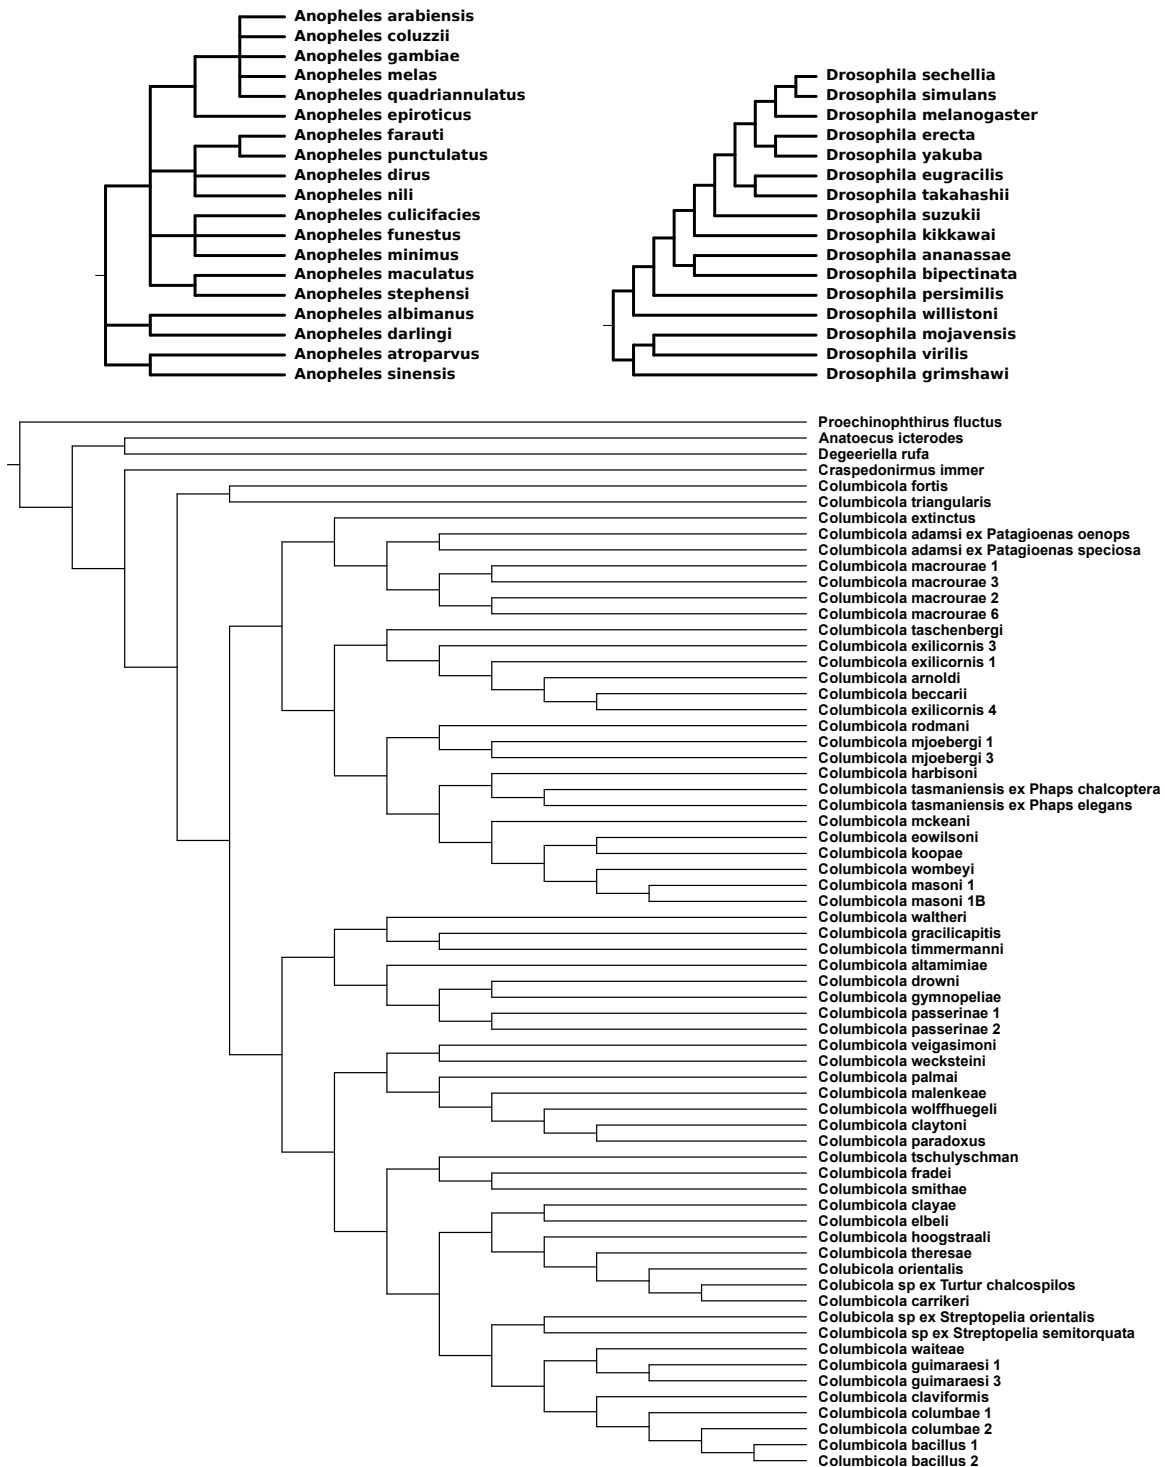

Fig. S1. The reference biological trees obtained from Open Tree of Life (*Drosophila* and *Anopheles*) and from Boyd *et al.* (2017) (*Columbicola*).

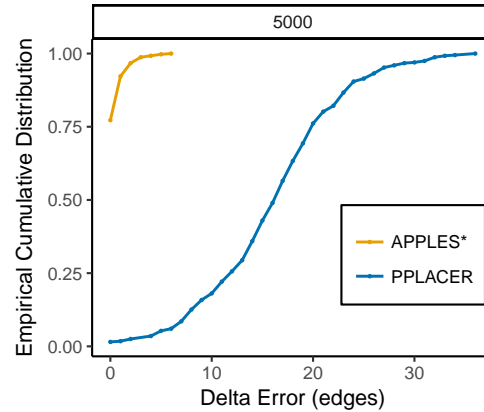

Fig. S2. **APPLES versus pplacer on 5,000 backbone trees.** The empirical cumulative distribution of the delta error is shown. We compare pplacer and APPLES\* on RNASim-VS dataset with 5000 leaves. Distributions is over 551 cases where pplacer could run for the panel.

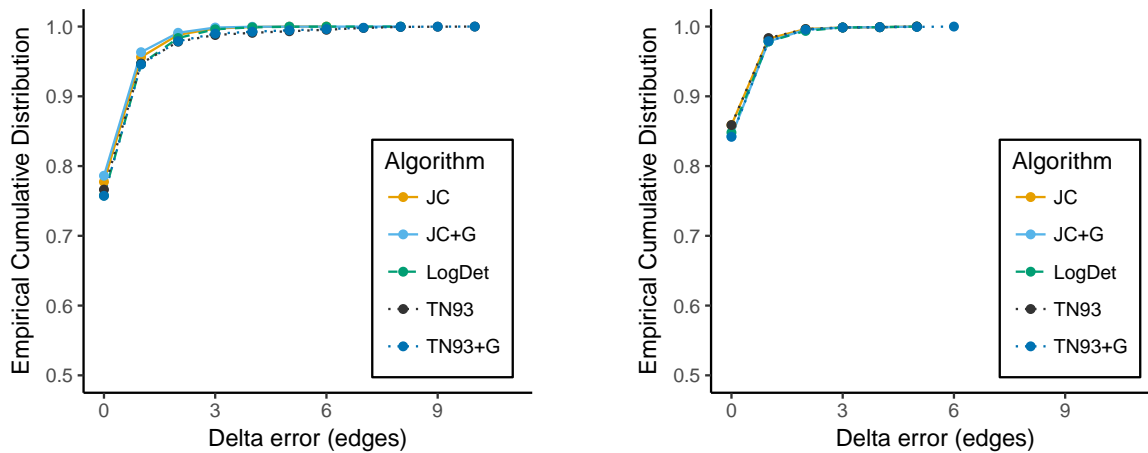

Fig. S3. **Comparing various models of DNA evolution.** For the GTR (a) and RNASim-heterogeneous (b) datasets, we show the delta error (edges) of APPLES\* run with five distance matrices calculated based on different models of DNA evolution. All model parameters are estimated per pair of sequences. The five models have similar accuracy.

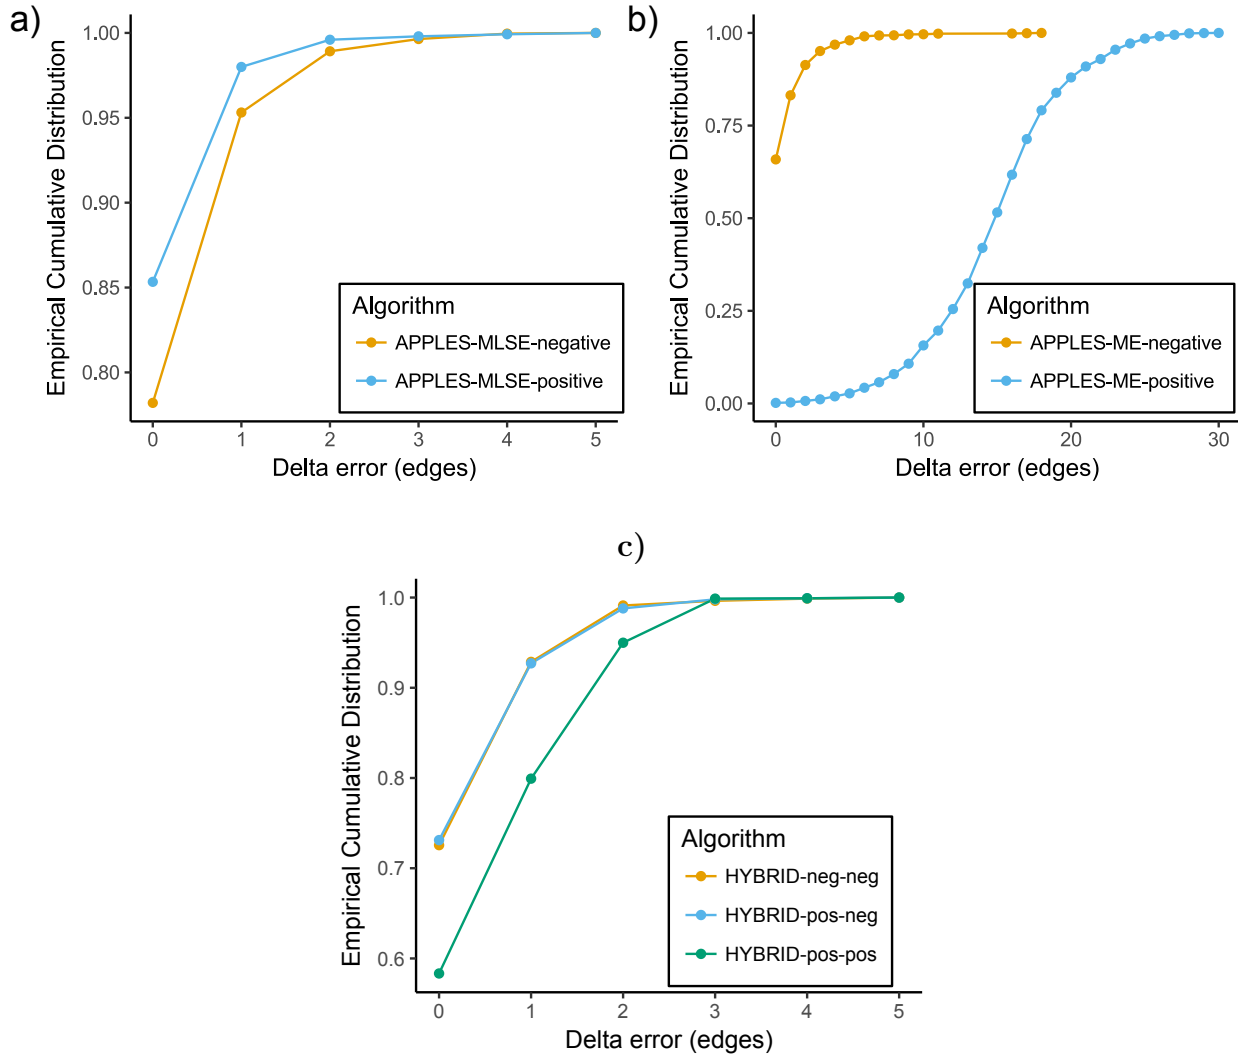

Fig. S4. (a,b) **The effect of imposing positivity constraint on error.** We show the error of (a) APPLES-MLSE and (b) APPLES-ME run both with and without enforcement of non-negative branch lengths on RNASim heterogeneous dataset. Accuracy improves substantially for MLSE whereas it reduces drastically for ME. (c) **The effect of imposing positivity constraint on accuracy on Hybrid.** The HYBRID approach does not benefit from imposing positivity constraint on its second (ME) stage.

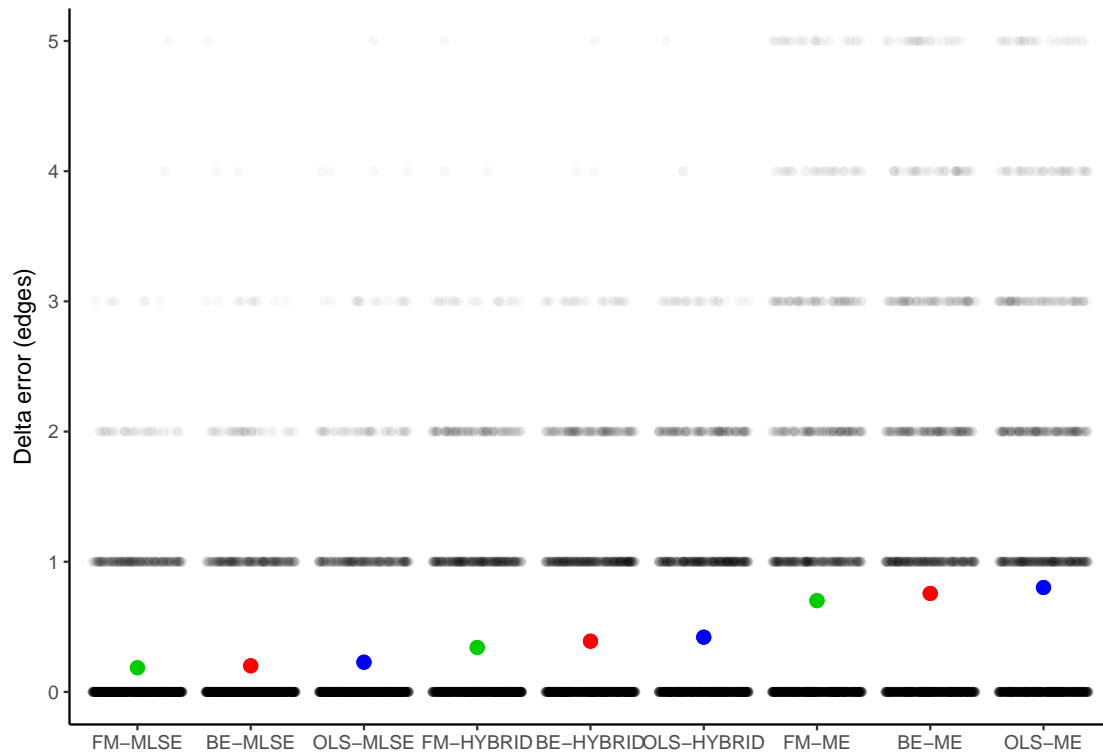

Fig. S5. **Comparing APPLES versions.** For the RNASim dataset (without controlling for the diameter), we show the delta error (edges) of APPLES run with three options for weighting: FM (green), BE (red), and OLS (blue), and three options for selection strategy (MLSE, ME, and Hybrid). For each method, the mean (colored circle) and standard errors (lines; too small to see) are shown over 2500 data points, each shown as dots. Some of the methods occasionally have error above 5 branches, but for better resolution, we cap the y-axis at 5.

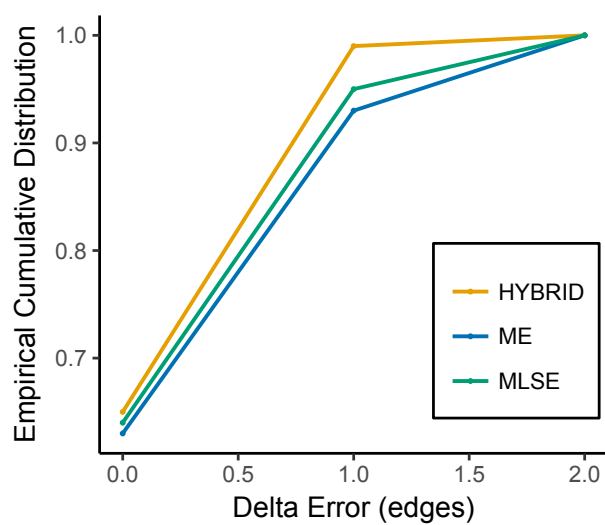

Fig. S6. **APPLES-HYBRID has higher accuracy on sparse RNAsim dataset** On the RNAsim dataset, we chose 20 sequences randomly from the larger RNAsim-heterogeneous dataset; here, APPLES-HYBRID has higher accuracy than APPLES\* (MLSE).

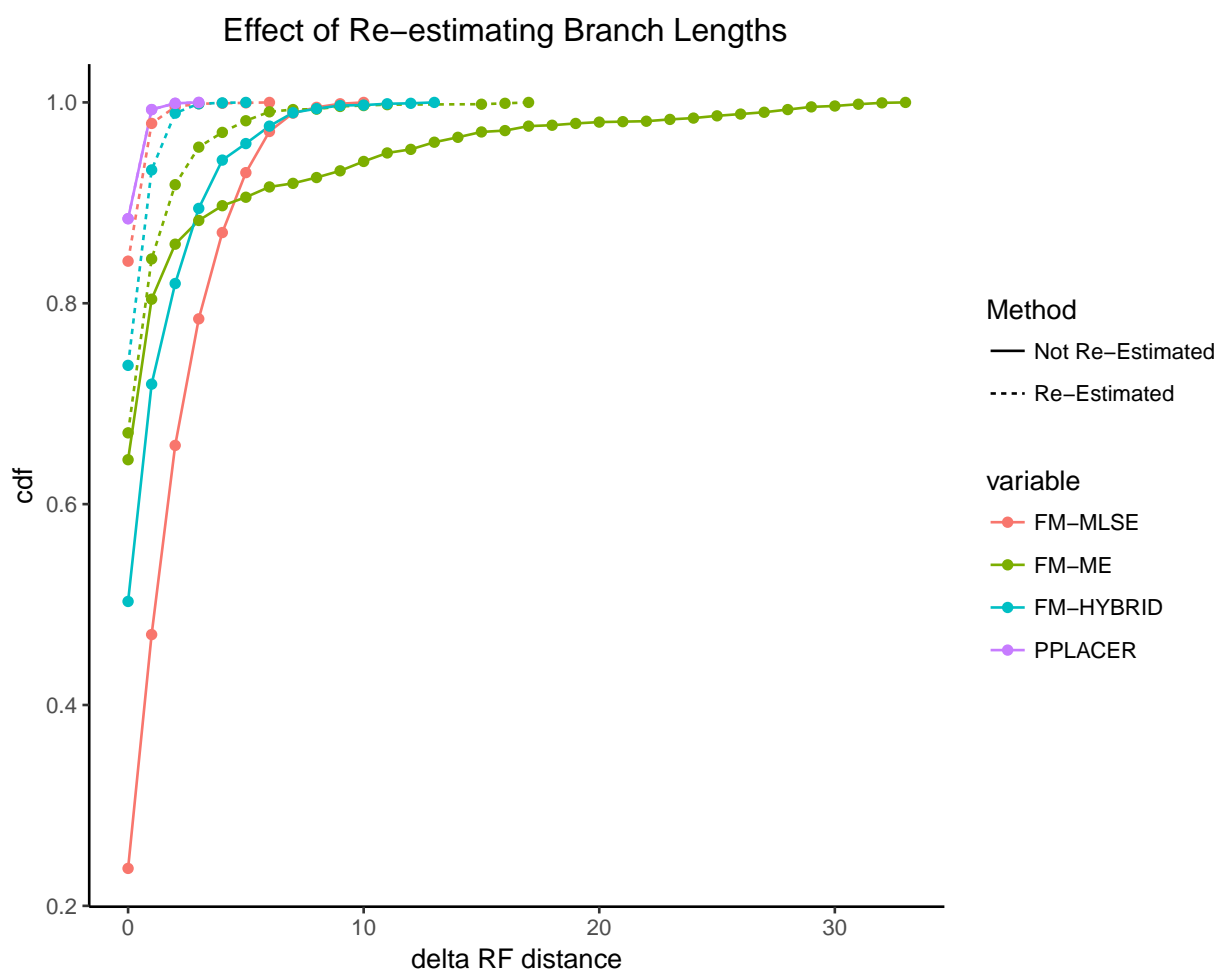

Fig. S7. **The effect of reestimating branch lengths of the backbone tree on accuracy.** We show the accuracy of pplacer and APPLES-FM with its three optimization criteria. APPLES is run both with (dotted) and without (solid) re-estimating branch lengths in the backbone tree using the same model (here, TN93+ $\Gamma$ ) used for computing distances of query sequences to backbone sequences. FastME\* is used to re-estimate branch lengths. Accuracy improves dramatically by recomputing backbone branch lengths using the same model. The case labeled "Not re-estimated" uses branch lengths produced using RAxML under the GTR+ $\Gamma$  model.

APPENDIX C. SUPPLEMENTARY TABLES

Table S1. GenBank accession numbers and URLs for the dataset of 22 Anopheles genomes

| Species                          | GenBank assembly accession | URL                                                                                                                                                                                                                                                         |
|----------------------------------|----------------------------|-------------------------------------------------------------------------------------------------------------------------------------------------------------------------------------------------------------------------------------------------------------|
| <i>Anopheles albimanus</i>       | GCA_000349125.1            | <a href="http://www.insect-genome.com/data/genome_download/Anopheles_albimanus/Anopheles_albimanus_genomic.fasta.gz">http://www.insect-genome.com/data/genome_download/Anopheles_albimanus/Anopheles_albimanus_genomic.fasta.gz</a>                         |
| <i>Anopheles arabiensis</i>      | GCA_000349185.1            | <a href="http://www.insect-genome.com/data/genome_download/Anopheles_arabiensis/Anopheles_arabiensis_genomic.fasta.gz">http://www.insect-genome.com/data/genome_download/Anopheles_arabiensis/Anopheles_arabiensis_genomic.fasta.gz</a>                     |
| <i>Anopheles atroparvus</i>      | GCA_000473505.1            | <a href="http://www.insect-genome.com/data/genome_download/Anopheles_atroparvus/Anopheles_atroparvus_genomic.fasta.gz">http://www.insect-genome.com/data/genome_download/Anopheles_atroparvus/Anopheles_atroparvus_genomic.fasta.gz</a>                     |
| <i>Anopheles christyi</i>        | GCA_000349165.1            | <a href="http://www.insect-genome.com/data/genome_download/Anopheles_christyi/Anopheles_christyi_genomic.fasta.gz">http://www.insect-genome.com/data/genome_download/Anopheles_christyi/Anopheles_christyi_genomic.fasta.gz</a>                             |
| <i>Anopheles coluzzii</i>        | -                          | <a href="http://www.insect-genome.com/data/genome_download/Anopheles_coluzzii/Anopheles_coluzzii_genomic.fasta.gz">http://www.insect-genome.com/data/genome_download/Anopheles_coluzzii/Anopheles_coluzzii_genomic.fasta.gz</a>                             |
| <i>Anopheles culicifacies</i>    | GCA_000473375.1            | <a href="http://www.insect-genome.com/data/genome_download/Anopheles_culicifacies/Anopheles_culicifacies_genomic.fasta.gz">http://www.insect-genome.com/data/genome_download/Anopheles_culicifacies/Anopheles_culicifacies_genomic.fasta.gz</a>             |
| <i>Anopheles darlingi</i>        | GCA_000211455.3            | <a href="http://www.insect-genome.com/data/genome_download/Anopheles_darlingi/Anopheles_darlingi_genomic.fasta.gz">http://www.insect-genome.com/data/genome_download/Anopheles_darlingi/Anopheles_darlingi_genomic.fasta.gz</a>                             |
| <i>Anopheles dirus</i>           | GCA_000349145.1            | <a href="http://www.insect-genome.com/data/genome_download/Anopheles_dirus/Anopheles_dirus_genomic.fasta.gz">http://www.insect-genome.com/data/genome_download/Anopheles_dirus/Anopheles_dirus_genomic.fasta.gz</a>                                         |
| <i>Anopheles epiroticus</i>      | GCA_000349105.1            | <a href="http://www.insect-genome.com/data/genome_download/Anopheles_epiroticus/Anopheles_epiroticus_genomic.fasta.gz">http://www.insect-genome.com/data/genome_download/Anopheles_epiroticus/Anopheles_epiroticus_genomic.fasta.gz</a>                     |
| <i>Anopheles farauti</i>         | GCA_000956265.1            | <a href="http://www.insect-genome.com/data/genome_download/Anopheles_farauti/Anopheles_farauti_genomic.fasta.gz">http://www.insect-genome.com/data/genome_download/Anopheles_farauti/Anopheles_farauti_genomic.fasta.gz</a>                                 |
| <i>Anopheles funestus</i>        | GCA_000349085.1            | <a href="http://www.insect-genome.com/data/genome_download/Anopheles_funestus/Anopheles_funestus_genomic.fasta.gz">http://www.insect-genome.com/data/genome_download/Anopheles_funestus/Anopheles_funestus_genomic.fasta.gz</a>                             |
| <i>Anopheles gambiae</i>         | GCA_000150785.1            | <a href="http://www.insect-genome.com/data/genome_download/Anopheles_gambiae/Anopheles_gambiae_genomic.fasta.gz">http://www.insect-genome.com/data/genome_download/Anopheles_gambiae/Anopheles_gambiae_genomic.fasta.gz</a>                                 |
| <i>Anopheles koliensis</i>       | GCA_000956275.1            | <a href="http://www.insect-genome.com/data/genome_download/Anopheles_koliensis/Anopheles_koliensis_genomic.fasta.gz">http://www.insect-genome.com/data/genome_download/Anopheles_koliensis/Anopheles_koliensis_genomic.fasta.gz</a>                         |
| <i>Anopheles maculatus</i>       | GCA_000473185.1            | <a href="http://www.insect-genome.com/data/genome_download/Anopheles_maculatus/Anopheles_maculatus_genomic.fasta.gz">http://www.insect-genome.com/data/genome_download/Anopheles_maculatus/Anopheles_maculatus_genomic.fasta.gz</a>                         |
| <i>Anopheles melas</i>           | GCA_000473525.2            | <a href="http://www.insect-genome.com/data/genome_download/Anopheles_melas/Anopheles_melas_genomic.fasta.gz">http://www.insect-genome.com/data/genome_download/Anopheles_melas/Anopheles_melas_genomic.fasta.gz</a>                                         |
| <i>Anopheles merus</i>           | GCA_000473845.2            | <a href="http://www.insect-genome.com/data/genome_download/Anopheles_merus/Anopheles_merus_genomic.fasta.gz">http://www.insect-genome.com/data/genome_download/Anopheles_merus/Anopheles_merus_genomic.fasta.gz</a>                                         |
| <i>Anopheles minimus</i>         | GCA_000349025.1            | <a href="http://www.insect-genome.com/data/genome_download/Anopheles_minimus/Anopheles_minimus_genomic.fasta.gz">http://www.insect-genome.com/data/genome_download/Anopheles_minimus/Anopheles_minimus_genomic.fasta.gz</a>                                 |
| <i>Anopheles nili</i>            | GCA_000439205.1            | <a href="http://www.insect-genome.com/data/genome_download/Anopheles_nili/Anopheles_nili_genomic.fasta.gz">http://www.insect-genome.com/data/genome_download/Anopheles_nili/Anopheles_nili_genomic.fasta.gz</a>                                             |
| <i>Anopheles punctulatus</i>     | GCA_000956255.1            | <a href="http://www.insect-genome.com/data/genome_download/Anopheles_punctulatus/Anopheles_punctulatus_genomic.fasta.gz">http://www.insect-genome.com/data/genome_download/Anopheles_punctulatus/Anopheles_punctulatus_genomic.fasta.gz</a>                 |
| <i>Anopheles quadriannulatus</i> | GCA_000349065.1            | <a href="http://www.insect-genome.com/data/genome_download/Anopheles_quadriannulatus/Anopheles_quadriannulatus_genomic.fasta.gz">http://www.insect-genome.com/data/genome_download/Anopheles_quadriannulatus/Anopheles_quadriannulatus_genomic.fasta.gz</a> |
| <i>Anopheles sinensis</i>        | GCA_000441895.2            | <a href="http://www.insect-genome.com/data/genome_download/Anopheles_sinensis/Anopheles_sinensis_genomic.fasta.gz">http://www.insect-genome.com/data/genome_download/Anopheles_sinensis/Anopheles_sinensis_genomic.fasta.gz</a>                             |
| <i>Anopheles stephensi</i>       | GCA_000300775.2            | <a href="http://www.insect-genome.com/data/genome_download/Anopheles_stephensi/Anopheles_stephensi_genomic.fasta.gz">http://www.insect-genome.com/data/genome_download/Anopheles_stephensi/Anopheles_stephensi_genomic.fasta.gz</a>                         |

Table S2. GenBank accession numbers and URLs for the dataset of 21 Drosophila genomes

| Species                        | GenBank assembly accession | URL                                                                                                                                                                                                                                                 |
|--------------------------------|----------------------------|-----------------------------------------------------------------------------------------------------------------------------------------------------------------------------------------------------------------------------------------------------|
| <i>Drosophila ananassae</i>    | GCA_000005115.1            | <a href="http://www.insect-genome.com/data/genome_download/Drosophila_ananassae/Drosophila_ananassae_genomic.fasta.gz">http://www.insect-genome.com/data/genome_download/Drosophila_ananassae/Drosophila_ananassae_genomic.fasta.gz</a>             |
| <i>Drosophila biarmipes</i>    | GCA_000233415.2            | <a href="http://www.insect-genome.com/data/genome_download/Drosophila_biarmipes/Drosophila_biarmipes_genomic.fasta.gz">http://www.insect-genome.com/data/genome_download/Drosophila_biarmipes/Drosophila_biarmipes_genomic.fasta.gz</a>             |
| <i>Drosophila bipectinata</i>  | GCA_000236285.2            | <a href="http://www.insect-genome.com/data/genome_download/Drosophila_bipectinata/Drosophila_bipectinata_genomic.fasta.gz">http://www.insect-genome.com/data/genome_download/Drosophila_bipectinata/Drosophila_bipectinata_genomic.fasta.gz</a>     |
| <i>Drosophila elegans</i>      | GCA_000224195.2            | <a href="http://www.insect-genome.com/data/genome_download/Drosophila_elegans/Drosophila_elegans_genomic.fasta.gz">http://www.insect-genome.com/data/genome_download/Drosophila_elegans/Drosophila_elegans_genomic.fasta.gz</a>                     |
| <i>Drosophila erecta</i>       | GCA_000005135.1            | <a href="http://www.insect-genome.com/data/genome_download/Drosophila_erecta/Drosophila_erecta_genomic.fasta.gz">http://www.insect-genome.com/data/genome_download/Drosophila_erecta/Drosophila_erecta_genomic.fasta.gz</a>                         |
| <i>Drosophila eugracilis</i>   | GCA_000236325.2            | <a href="http://www.insect-genome.com/data/genome_download/Drosophila_eugracilis/Drosophila_eugracilis_genomic.fasta.gz">http://www.insect-genome.com/data/genome_download/Drosophila_eugracilis/Drosophila_eugracilis_genomic.fasta.gz</a>         |
| <i>Drosophila ficusphila</i>   | GCA_000220665.2            | <a href="http://www.insect-genome.com/data/genome_download/Drosophila_ficusphila/Drosophila_ficusphila_genomic.fasta.gz">http://www.insect-genome.com/data/genome_download/Drosophila_ficusphila/Drosophila_ficusphila_genomic.fasta.gz</a>         |
| <i>Drosophila grimshawi</i>    | GCA_000005155.1            | <a href="http://www.insect-genome.com/data/genome_download/Drosophila_grimshawi/Drosophila_grimshawi_genomic.fasta.gz">http://www.insect-genome.com/data/genome_download/Drosophila_grimshawi/Drosophila_grimshawi_genomic.fasta.gz</a>             |
| <i>Drosophila kikkawai</i>     | GCA_000224215.2            | <a href="http://www.insect-genome.com/data/genome_download/Drosophila_kikkawai/Drosophila_kikkawai_genomic.fasta.gz">http://www.insect-genome.com/data/genome_download/Drosophila_kikkawai/Drosophila_kikkawai_genomic.fasta.gz</a>                 |
| <i>Drosophila melanogaster</i> | GCA_000778455.1            | <a href="http://www.insect-genome.com/data/genome_download/Drosophila_melanogaster/Drosophila_melanogaster_genomic.fasta.gz">http://www.insect-genome.com/data/genome_download/Drosophila_melanogaster/Drosophila_melanogaster_genomic.fasta.gz</a> |
| <i>Drosophila miranda</i>      | GCA_000269505.2            | <a href="http://www.insect-genome.com/data/genome_download/Drosophila_miranda/Drosophila_miranda_genomic.fasta.gz">http://www.insect-genome.com/data/genome_download/Drosophila_miranda/Drosophila_miranda_genomic.fasta.gz</a>                     |
| <i>Drosophila mojavensis</i>   | GCA_000005175.1            | <a href="http://www.insect-genome.com/data/genome_download/Drosophila_mojavensis/Drosophila_mojavensis_genomic.fasta.gz">http://www.insect-genome.com/data/genome_download/Drosophila_mojavensis/Drosophila_mojavensis_genomic.fasta.gz</a>         |
| <i>Drosophila persimilis</i>   | GCA_000005195.1            | <a href="http://www.insect-genome.com/data/genome_download/Drosophila_persimilis/Drosophila_persimilis_genomic.fasta.gz">http://www.insect-genome.com/data/genome_download/Drosophila_persimilis/Drosophila_persimilis_genomic.fasta.gz</a>         |
| <i>Drosophila rhopaloa</i>     | GCA_000236305.2            | <a href="http://www.insect-genome.com/data/genome_download/Drosophila_rhopaloea/Drosophila_rhopaloea_genomic.fasta.gz">http://www.insect-genome.com/data/genome_download/Drosophila_rhopaloea/Drosophila_rhopaloea_genomic.fasta.gz</a>             |
| <i>Drosophila sechellia</i>    | GCA_000005215.1            | <a href="http://www.insect-genome.com/data/genome_download/Drosophila_sechellia/Drosophila_sechellia_genomic.fasta.gz">http://www.insect-genome.com/data/genome_download/Drosophila_sechellia/Drosophila_sechellia_genomic.fasta.gz</a>             |
| <i>Drosophila simulans</i>     | GCA_000259055.1            | <a href="http://www.insect-genome.com/data/genome_download/Drosophila_simulans/Drosophila_simulans_genomic.fasta.gz">http://www.insect-genome.com/data/genome_download/Drosophila_simulans/Drosophila_simulans_genomic.fasta.gz</a>                 |
| <i>Drosophila suzukii</i>      | GCA_000472105.1            | <a href="http://www.insect-genome.com/data/genome_download/Drosophila_suzukii/Drosophila_suzukii_genomic.fasta.gz">http://www.insect-genome.com/data/genome_download/Drosophila_suzukii/Drosophila_suzukii_genomic.fasta.gz</a>                     |
| <i>Drosophila takahashii</i>   | GCA_000224235.2            | <a href="http://www.insect-genome.com/data/genome_download/Drosophila_takahashii/Drosophila_takahashii_genomic.fasta.gz">http://www.insect-genome.com/data/genome_download/Drosophila_takahashii/Drosophila_takahashii_genomic.fasta.gz</a>         |
| <i>Drosophila virilis</i>      | GCA_000005245.1            | <a href="http://www.insect-genome.com/data/genome_download/Drosophila_virilis/Drosophila_virilis_genomic.fasta.gz">http://www.insect-genome.com/data/genome_download/Drosophila_virilis/Drosophila_virilis_genomic.fasta.gz</a>                     |
| <i>Drosophila willistoni</i>   | GCA_000005925.1            | <a href="http://www.insect-genome.com/data/genome_download/Drosophila_willistoni/Drosophila_willistoni_genomic.fasta.gz">http://www.insect-genome.com/data/genome_download/Drosophila_willistoni/Drosophila_willistoni_genomic.fasta.gz</a>         |
| <i>Drosophila yakuba</i>       | GCA_000005975.1            | <a href="http://www.insect-genome.com/data/genome_download/Drosophila_yakuba/Drosophila_yakuba_genomic.fasta.gz">http://www.insect-genome.com/data/genome_download/Drosophila_yakuba/Drosophila_yakuba_genomic.fasta.gz</a>                         |

Table S3. GenBank accession numbers of microbial species used in contamination removal.

| Species                           | GenBank assembly accession |
|-----------------------------------|----------------------------|
| <i>Pasteurella langaeensis</i>    | GCA_003096995.1            |
| <i>Providencia stuartii</i>       | GCA_001558855.2            |
| <i>Serratia marcescens</i>        | GCA_000783915.2            |
| <i>Shigella flexneri</i>          | GCA_000006925.2            |
| <i>Commensalibacter intestini</i> | GCA_002153535.1            |
| <i>Acetobacter malorum</i>        | GCA_002153605.1            |
| <i>Acetobacter pomorum</i>        | GCA_002456135.1            |
| <i>Lactobacillus plantarum</i>    | GCA_000203855.3            |
| <i>Lactobacillus brevis</i>       | GCA_003184305.1            |
| <i>Enterococcus faecalis</i>      | GCA_002208945.2            |
| <i>Vagococcus teuberi</i>         | GCA_001870205.1            |
| <i>Wolbachia</i>                  | GCA_000022285.1            |



|                               | 0.1G |            |           | 0.5G |            |           |
|-------------------------------|------|------------|-----------|------|------------|-----------|
|                               | %    | $\Delta e$ | $e_{max}$ | %    | $\Delta e$ | $e_{max}$ |
| <b>(a) <i>Columbicola</i></b> |      |            |           |      |            |           |
| APPLES*                       | 97   | 0.03       | 1         | 92   | 0.08       | 1         |
| APPLES-ME                     | 84   | 0.28       | 5         | 87   | 0.21       | 5         |
| APPLES-HYBRID                 | 87   | 0.16       | 2         | 87   | 0.16       | 2         |
| CLOSEST                       | 54   | 1.15       | 7         | 58   | 0.91       | 8         |
| DE-NOVO                       | 98   | 0.02       | 1         | 92   | 0.08       | 1         |
| <b>(b) <i>Anopheles</i></b>   |      |            |           |      |            |           |
| APPLES*                       | 95   | 0.05       | 1         | 95   | 0.05       | 1         |
| APPLES-ME                     | 95   | 0.05       | 1         | 95   | 0.05       | 1         |
| APPLES-HYBRID                 | 95   | 0.05       | 1         | 95   | 0.05       | 1         |
| CLOSEST                       | 91   | 0.09       | 1         | 95   | 0.05       | 1         |
| DE-NOVO                       | 95   | 0.05       | 1         | 95   | 0.05       | 1         |
| <b>(c) <i>Drosophila</i></b>  |      |            |           |      |            |           |
| APPLES*                       | 71   | 0.29       | 1         | 71   | 0.33       | 2         |
| APPLES-ME                     | 67   | 0.42       | 2         | 67   | 0.48       | 2         |
| APPLES-HYBRID                 | 67   | 0.33       | 1         | 67   | 0.38       | 2         |
| CLOSEST                       | 57   | 0.62       | 3         | 57   | 0.57       | 2         |
| DE-NOVO                       | 71   | 0.29       | 1         | 71   | 0.33       | 2         |

Table S4. **Assembly-free placement of genome-skims.** We show the percentage of correct placements (those that do not increase  $\Delta e$ ), average delta error ( $\Delta e$ ), and maximum delta error ( $e_{max}$ ) for APPLES, assignment to the CLOSEST species, and the placement to the position in the backbone (DE-NOVO) over the 61 (a), 22 (b), and 21 (c) placements. Results are shown for skims with 0.1 and 0.5Gbp of reads. Delta error is the increase in the number missing branches between the reference tree and the backbone tree after placing each query.

801

## APPENDIX D. COMMANDS

802

### *Sampling Clades*

803

For sampling clades of size at most 250 from a tree "tree.nwk", we used the

804

TreeCluster package, available at <https://github.com/niemasd/TreeCluster>.

```
#!/bin/bash
```

```
python TreeCluster/TreeCluster.py -i 250 -o clusters.txt -t tree.nwk  
-m count_max_clade
```

805

### *Computing Distance Matrices*

806

APPLES version 1.2.0 can compute JC69 distances between nucleotide sequences.

807

Version 1.1.0 internally uses FastME\* (based on FastME version 2.1.6.1) which is available

808

at <https://github.com/balabanmetin/FastME-personal-copy>. We computed distance

809

matrices based on other models (e.g. TN93+ $\Gamma$ ) using following FastME command:

```
#!/bin/bash
```

```
fastme -c -dT --gamma=${gamma} -i aln_dna.phy -O dist.mat -T 1
```

810

where  $\${gamma}$  is  $\Gamma$  the rate variable.

811

### *Backbone tree estimation*

812

When multiple sequence alignment is available, we used the following RAxML

813

command to compute backbone tree for all datasets except RNAsim-VS dataset. We used

814

RAxML version 7.2.6

```
#!/bin/bash
```

```
raxmlHPC-PTHREADS -m GTRGAMMA -p 88 -n REF -s aln_dna.phy -T 6
```

815

For RNAsim-VS dataset, we used FastTreeMP version 2.1.10 for estimating

816

backbone topology. We run FastTreeMP with the following command:

```
#!/bin/bash
```

```
FastTreeMP -nosupport -gtr -gamma -nt -log tree.log < aln_dna.fa > tree.nwk
```

817 For alignment free datasets such as Drosophila dataset, we computed backbone tree  
818 using FastME\* (based on FastME version 2.1.6.1) which is available at  
819 <https://github.com/balabanmetin/FastME-personal-copy>. FastME\* is run with the  
820 following command:

```
#!/bin/bash
```

```
fastme -i dist.mat -o tree.nwk -T 1
```

821 Note that we performed Jukes-Cantor correction on the distance matrix "dist.mat"  
822 before running FastME\*.

### 823 *Backbone tree branch length re-estimation*

824 When multiple sequence alignment is available, we used FastME\* to recompute  
825 backbone tree branch lengths for all datasets except RNAsim-VS dataset. We run  
826 FastME\* with the following command:

```
#!/bin/bash
```

```
fastme -dJ -i aln_dna.phy -u RAxML_result.REF -o tree_me.nwk
```

827 For RNAsim-VS dataset, we used RAxML version 7.2.6 for re-estimating ML based  
828 branch lengths and used that tree for performing placements using pplacer. RAxML is run  
829 with the following command:

```
#!/bin/bash
```

```
raxmlHPC-PTHREADS -f e -t tree.nwk -m GTRGAMMA -s aln_dna.phy -n REF -p 1984 -T 8
```

830 On the other hand, we used RAxML version 8.2.12 to compute backbone tree  
831 (branch lengths update only) and ML model parameters required for EPA-ng:

```
#!/bin/bash
```

```
raxmlHPC-PTHREADS -f e -t tree.nwk -m GTRGAMMA -s aln_dna.fa -n REF8 -p 1984 -T 8
```

832 For all large alignments with 10,000 or more sequences in RNASim-VS, RAxML  
833 version 8.2.12 fail to run due to estimated gamma rate being either too small or too large.  
834 In those cases, we ran the following command to use GTRCAT model instead:

```
#!/bin/bash
```

```
raxmlHPC-PTHREADS -f e -t tree.nwk -m GTRCAT -s aln_dna.fa -n REF8 -p 1984 -T 8
```

835 For the same dataset, we used FastTree again for re-estimating Minimum Evolution  
836 based branch lengths and used that tree for performing placements using APPLES.  
837 FastTree is run with the following command:

```
#!/bin/bash
```

```
FastTreeMP -nosupport -nt -nome -noml -log tree.log  
-intree tree.nwk < aln_dna.fa > tree_me.nwk
```

### 838 *Performing placement*

839 We performed phylogenetic placement of a query using pplacer version  
840 1.1.alpha19-0-g807f6f3 with the following command:

```
#!/bin/bash
```

```
pplacer -m GTR -s RAxML_info.REF -t backbone.nwk -o query.jplace aln_dna.fa -j 1
```

841 We performed EPA-ng placements using version 0.3.5 with the following command:

```
#!/bin/bash
```

```
epa-ng --ref-msa aln_dna.fa --tree backbone.nwk --query query.fa --outdir .  
--model RAxML_info.REF8 --redo -T 1
```

842 Except in our RNASim-VS, RNASim-QS and estimated alignments analyses, we  
843 used APPLES version 1.1.0 (can be found at

844 <https://github.com/balabanmetin/apples/releases>) for placement. When alignment  
845 is not present, we performed the placement running the following command:

```
#!/bin/bash
```

```
python ~/apples/least_squares_placement.py -t backbone.tree -d dist.mat -a FM  
-s MLSE -p > apples.nwk
```

846 When alignment is present, we used the following command instead:

```
#!/bin/bash
```

```
python ~/apples/least_squares_placement.py -t backbone.nwk -a aln_dna.phy  
-a FM -s MLSE -p > apples.nwk
```

847 For RNASim-VS, RNASim-QS and estimated alignments analyses, we used  
848 APPLES version 1.2.0 and ran with the following command:

```
#!/bin/bash
```

```
python ~/apples/run_apples.py -t backbone.nwk -s aln_dna.fa -q query.fa  
-T $numcores -o apples.jplace
```

849 where *\$numcores* depends on the number of cores designated for the analysis.

850 *Working with estimated backbone and query-to backbone alignments*

851 We created a version of SEPP within which APPLES integrated. This version is  
852 available at <https://github.com/balabanmetin/sepp>. We performed placement on  
853 RNAsim-AE dataset with 10,000 sequences using SEPP+APPLES with the following  
854 command:

```
#!/bin/bash
```

```
python ~/sepp/run_sepp.py -t estimated_backbone.nwk -a estimated_aln.fa  
-r RAxML_info.REF -f query.fa -pl apples -x 28 -A 1000 -o apples
```

855 On the same dataset, we ran SEPP in default mode using the following command:

```
#!/bin/bash
```

```
python ~/sepp/run_sepp.py -t estimated_backbone.nwk -a estimated_aln.fa  
-r RAxML_info.REF8 -f query.fa -pl pplacer -x 28 -A 1000 -P 1000 -o pplacer
```
